# 1 **Male meiotic spindle features that efficiently segregate** 2 **paired and lagging chromosomes**

3  
4 Gunar Fabig<sup>1</sup>, Robert Kiewisz<sup>1</sup>, Norbert Lindow<sup>2</sup>, James A. Powers<sup>3</sup>, Vanessa Cota<sup>4</sup>, Leslie  
5 Mateo<sup>4</sup>, Jan Brugués<sup>5,6,7</sup>, Steffen Prohaska<sup>2</sup>, Diana S. Chu<sup>4,8</sup>, and Thomas Müller-Reichert<sup>1,8</sup>

6  
7 <sup>1</sup>Experimental Center, Faculty of Medicine Carl Gustav Carus, Technische Universität Dresden,  
8 01307 Dresden, Germany

9 <sup>2</sup>Zuse Institute Berlin, 14195 Berlin, Germany

10 <sup>3</sup>Light Microscopy Imaging Center, Indiana University, Bloomington, IN 47405, USA

11 <sup>4</sup>Department of Biology, San Francisco State University, San Francisco, CA 94132, USA

12 <sup>5</sup>Max Planck Institute of Molecular Cell Biology and Genetics, 01307 Dresden, Germany

13 <sup>6</sup>Max Planck Institute for the Physics of Complex Systems, 01187 Dresden, Germany

14 <sup>7</sup>Centre for Systems Biology Dresden, 01307 Dresden, Germany

15 <sup>8</sup>These authors co-advised this work.

16

17

18 Send correspondence to:

19 T. Müller-Reichert

20 Tel.: +49 351 458 6442

21 E-mail: [mueller-reichert@tu-dresden.de](mailto:mueller-reichert@tu-dresden.de)

22

23 **Abstract**

24 Chromosome segregation during male meiosis is tailored to rapidly generate multitudes of  
25 sperm. Little, however, is known about the mechanisms that efficiently segregate chromosomes  
26 to produce sperm. Using live imaging in *Caenorhabditis elegans*, we find that spermatocytes  
27 exhibit simultaneous pole-to-chromosome shortening (anaphase A) and pole-to-pole elongation  
28 (anaphase B). Electron tomography unexpectedly revealed that spermatocyte anaphase A does  
29 not stem from kinetochore microtubule shortening. Instead, movement is driven by changes in  
30 distance between chromosomes, microtubules, and centrosomes upon tension release at  
31 anaphase onset. We also find that the lagging X chromosome, a distinctive feature of  
32 anaphase I in *C. elegans* males, is due to lack of chromosome pairing. The unpaired  
33 chromosome remains tethered to centrosomes by continuously lengthening kinetochore  
34 microtubules which are under tension, suggesting a ‘tug of war’ that can reliably resolve  
35 chromosome lagging. Overall, we define features that partition both paired and lagging  
36 chromosomes for optimal sperm production.

## 37 **Introduction**

38 Chromosome segregation during meiosis is regulated in each sex to produce different numbers  
39 of cells of distinct size, shape, and function. In humans, for example, up to 1500 sperm are  
40 continually generated per second via two rapid rounds of symmetric meiotic divisions. In  
41 contrast, only oocytes that are fertilized will complete asymmetric meiotic divisions to produce  
42 one large cell and two to three small polar bodies (El Yakoubi and Wassmann, 2017; L'Hernault,  
43 2006; O'Donnell and O'Bryan, 2014; Severson et al., 2016; Shakes et al., 2009). While oocyte  
44 meiosis and also mitosis have been studied in detail in many organisms (Bennabi et al., 2016;  
45 Muller-Reichert et al., 2010; Pintard and Bowerman, 2019), our current knowledge of sperm  
46 meiotic chromosome segregation is limited to studies using chromosome manipulation and laser  
47 microsurgery in grasshoppers and crane flies (LaFountain et al., 2011; LaFountain et al., 2012;  
48 Nicklas and Kubai, 1985; Nicklas et al., 2001; Zhang and Nicklas, 1995). Thus, despite recent  
49 evidence of steep global declines in human sperm counts (Levine et al., 2017; Levine et al.,  
50 2018; Sengupta et al., 2018), little is known about the fundamental molecular mechanisms of  
51 male meiotic chromosome segregation that are required for efficiently forming healthy sperm.

52 Spermatocytes exhibit vastly distinct spindle structures and dynamics with respect to spindle  
53 poles, chromosomes, and kinetochores compared to oocytes or cells in mitosis (Crowder et al.,  
54 2015; Hauf and Watanabe, 2004). In many species, centrosomes are present in spermatocyte  
55 meiosis and mitosis but not in oocyte meiosis, which highly influences microtubule organization  
56 that specifies differences in spindle structure, size, and shape. Chromosomes also adopt  
57 different shapes, potentially altering the types and degree of interactions with microtubules. In  
58 the model organism *Caenorhabditis elegans*, for example, chromosomes resemble compact  
59 oblong spheres in spermatocyte and oocyte meiosis (Albertson and Thomson, 1993; Redemann  
60 et al., 2018; Shakes et al., 2009) but are long rods in mitosis (Oegema et al., 2001; Redemann  
61 et al., 2017). Kinetochores structure and dynamics during meiosis also vary from mitosis, where

62 kinetochores attach each sister chromatid to microtubules that distribute sisters to opposite  
63 poles during the single division. During meiosis I when homologs separate, kinetochores on  
64 sister chromatids attach to microtubules from the same pole. Kinetochores must then somehow  
65 detach and re-attach to microtubules to allow sisters to then segregate to opposite poles for  
66 meiosis II (Petronczki et al., 2003). In acentrosomal oocyte meiosis, this is accomplished  
67 because outer kinetochore levels dramatically decrease during anaphase I and then increase in  
68 preparation for meiosis II (Dumont and Desai, 2012; Dumont et al., 2010). The structure and  
69 dynamics of centrosomal spermatocyte meiotic spindles that achieve efficient meiotic  
70 chromosome segregation, however, are largely unknown.

71 Distinct spindle structures can also drive chromosome movement by different means (McIntosh,  
72 2017; McIntosh et al., 2012). During anaphase A, chromosome-to-pole distance decreases,  
73 while pole-to-pole distance is constant (Asbury, 2017). Typically, a shortening of kinetochore  
74 microtubules drives this anaphase A movement (Asbury, 2017). During anaphase B, the poles  
75 move closer to the cortex, causing the pole-to-pole distance to increase while chromosome-to-  
76 pole distance is constant (Scholey et al., 2016). Forces that separate poles are the pulling force  
77 acting on astral microtubules and the pushing force from microtubules forming in the spindle  
78 midzone as chromosomes separate. Systems differ in use of these means. *C. elegans* uses  
79 solely anaphase B during the first mitotic division (Nahaboo et al., 2015; Oegema et al., 2001).  
80 In *C. elegans* oocyte spindles, a shortening of the distance between chromosomes and the  
81 acentrosomal poles was observed before microtubules disassemble at the poles (McNally et al.,  
82 2016). Pushing forces generated by microtubules that assemble in the spindle midzone are  
83 suggested to drive the majority of segregation in the oocyte (Laband et al., 2017; Yu et al.,  
84 2019). Thus depending upon cellular context, different spindle structures will balance  
85 mechanisms and forces to drive chromosome movement. As yet, the mechanisms that drive  
86 segregation in sperm centrosomal meiotic spindles are unknown.

87 *C. elegans* is ideal to study chromosome segregation in spermatocytes. Sperm can be  
88 visualized by both light and electron microscopy in both sexes. *C. elegans*, which lacks a Y  
89 chromosome, determines sex by X chromosome number: hermaphrodites have two X  
90 chromosomes (XX), while males have one X (XO). Light microscopy has shown that during  
91 meiosis I, the unpaired (univalent) X chromosome in XO males lags during anaphase I  
92 (Albertson and Thomson, 1993; Fabig et al., 2016; Madl and Herman, 1979). Electron  
93 microscopy has defined the ultrastructural organization of *C. elegans* spindles in meiotic oocytes  
94 (Laband et al., 2017; Redemann et al., 2018; Srayko et al., 2006; Yu et al., 2019) and mitotic  
95 embryos (Albertson, 1984; O'Toole et al., 2003; Redemann et al., 2017; Yu et al., 2019) and  
96 unrevealed the holocentric nature of the *C. elegans* kinetochore (Albertson and Thomson, 1993;  
97 Howe et al., 2001; O'Toole et al., 2003). However, ultrastructural studies on chromosome and  
98 spindle organization during meiotic segregation have not been performed for spermatocytes,  
99 hindering our understanding of sex-specific regulation of meiotic chromosome segregation.

100 Given that sperm meiosis has both similarities and differences to oocyte meiosis and mitosis, a  
101 key question applicable to a broad range of organisms is how spindle structure and dynamics  
102 are regulated in sperm to navigate two rounds of centrosomal meiotic divisions, including the  
103 efficient resolution of lagging chromosomes. To answer this, we applied a combination of light  
104 microscopy with a newly developed approach for imaging meiosis in whole living males, high-  
105 resolution immunostaining, and electron tomography, which produces a large-scale 3D  
106 reconstruction of spermatocyte meiotic spindle structure. The combination of these results  
107 defines molecular mechanisms of sperm-specific movements that are driven by interactions of  
108 microtubules with chromosomes and spindle poles as they navigate two rounds of centrosomal  
109 meiotic divisions.

110

## 111 **Results**

### 112 **Spermatocyte meiotic spindles are distinguished by delayed segregation of the** 113 **unpaired X chromosome**

114 To visualize chromosome dynamics in spermatocyte meiosis, we developed *in situ* imaging of  
115 spermatocytes within *C. elegans* males to visualize microtubules and chromosomes labeled with  
116  $\beta$ -tubulin::GFP and histone::mCherry, respectively (**Fig. 1**). The chromosomes arrange in a  
117 rosette pattern, with paired autosomes surrounding the unpaired X chromosome at metaphase I  
118 (Albertson and Thomson, 1993). At anaphase I, homologs segregate towards opposite poles;  
119 the unpaired X chromosome, however, is left behind, attached to microtubules that connect to  
120 separating poles (**Fig. 1A**, arrowheads) (Albertson and Thomson, 1993). Later in anaphase I,  
121 the X moves towards one of the spindle poles (**Suppl. Movie S1**). Thus, it appears that sister  
122 chromatids of the unpaired X attach to opposite poles in meiosis I in contrast to the autosomes,  
123 in which sister chromatids attach to the same pole to enable segregation of homologs to  
124 opposite poles. Meiosis I, therefore, shows differences in the segregation of paired  
125 chromosomes compared to the unpaired X, in contrast to the second division, where sister  
126 chromatids of all chromosomes segregate to opposite poles (**Fig. 1B, Suppl. Movie S1**).

### 127 **Lagging of chromosomes is a consequence of a lack of pairing**

128 We probed if the lagging of the X may be due to a lack of having a pairing partner. Because both  
129 males and hermaphrodites undergo spermatogenesis in *C. elegans*, we compared the behavior  
130 of chromosomes in spermatocytes of wild-type males (XO) to those in animals with different  
131 numbers of chromosomes. First, though the unpaired X chromosome lags in wild-type male (XO)  
132 spermatocytes (**Fig. 2A**), paired X chromosomes in wild-type hermaphrodite (XX) spermatocytes  
133 did not (**Fig. 2B**). Further, we determine whether paired X chromosomes lag in males by  
134 analyzing mutant males that have two sex chromosomes (XX). For this, we imaged animals with  
135 the *tra-2(e1094)* mutation, which causes somatic transformation of XX animals to males  
136 (Hodgkin and Brenner, 1977). In over 80% ( $n = 43/53$ ) of *tra-2(e1094)* spindles we did not detect

137 lagging chromosomes during meiosis I (**Fig. 2C**). Therefore, paired X chromosomes in male  
138 spermatocyte meiosis do not lag, similar to paired sex chromosomes in hermaphrodites.

139 We next examined X chromosome lagging in *him-8(e1489)* hermaphrodites. Observing lagging  
140 in hermaphrodites would eliminate the possible effect of the male soma causing chromosomes  
141 to lag in meiosis I. Further, mutation of *him-8* results in lack of recognition of the pairing center  
142 on the X chromosome; thus, pairing, synapsis, and recombination of the X chromosomes do not  
143 occur (Phillips et al., 2005). In 70% (n = 14/20) of the analyzed *him-8(e1489)* spindles in  
144 hermaphrodites, we observed lagging of both X chromosomes during anaphase I (**Fig. 2D**).  
145 These results reveal that anaphase I chromosome lagging during spermatocyte meiosis is likely  
146 caused by an inability to undergo synapsis rather than by a somatic effect of the male sex.

147 To further exclude that lagging is exclusive to the X chromosome, we analyzed hermaphrodites  
148 and males with the *zim-2(tm574)* mutation, which prevents the pairing of autosome IV (Phillips  
149 and Dernburg, 2006). We observed lagging chromosomes in all spindles in hermaphrodites (n =  
150 10) and males (n = 5; **Fig. 2E and F**). Moreover, we created triploid males with spermatocytes  
151 containing five unpaired autosomes (Madl and Herman, 1979). In all meiosis I spindles of triploid  
152 worms (n = 32) we detected a massive fluorescent signal between segregating autosomes that  
153 correspond to the five unpaired autosomes (**Fig. 2G**). Collectively, these results show that  
154 lagging chromosomes during spermatocyte anaphase I are indeed a consequence of the lack of  
155 pairing and synapsis of any chromosome during prophase I and are not specific to sex  
156 chromosomes.

### 157 **Spermatocyte meiotic spindles display both anaphase A and B movement**

158 We next investigated how spermatocyte meiotic spindles drive chromosome movement over  
159 time. We measured changes in the pole-to-pole (P-P), autosome-to-autosome (A-A) and pole-to-  
160 autosome (P-A) distances during both meiotic divisions using a strain with centrosomes labeled  
161 with  $\gamma$ -tubulin::GFP and chromosomes labeled with H2B::mCherry (**Fig. 3A-B**). In meiosis I, the

162 pole-to-pole distance increased, which was evident in a sigmoidal curve where the initial and  
163 final spindle length are given by the two plateaus, and the segregation velocity was determined  
164 by the slope (**Fig. 3E**). The spindle length progressed from  $4.1 \pm 0.3 \mu\text{m}$  to  $8.0 \pm 0.6 \mu\text{m}$  (mean  $\pm$   
165 SD;  $n = 31$ ) with an elongation speed of  $1.29 \pm 0.36 \mu\text{m}/\text{min}$ . Further, we found a simultaneous  
166 anaphase A-type movement in that the pole-to-autosome distance decreased by half, from  $1.6 \pm$   
167  $0.3 \mu\text{m}$  to  $0.8 \pm 0.3 \mu\text{m}$  with a speed of  $-0.39 \pm 0.27 \mu\text{m}/\text{min}$  (**Movie S2; Table 1**). Chromosome  
168 dynamics in meiosis II also exhibited anaphase A and B-type movements (**Fig. 3C-D and F,**  
169 **Movie S3; Table 1**).

170 Taken together, spermatocyte meiotic spindles in *C. elegans* exhibit both anaphase A and B-  
171 type movements. This is distinct from mitosis in the early *C. elegans* embryo, which utilizes only  
172 anaphase B mechanisms (Oegema et al., 2001), or the oocyte, which uses acentrosomal  
173 mechanisms during meiosis (Dumont et al., 2010; McNally et al., 2016; Muscat et al., 2015;  
174 Redemann et al., 2018). Similar to grasshopper spermatocytes (Ris, 1949), anaphase A and B  
175 movement occurs simultaneously, with anaphase A contributing approximately one fifth to the  
176 overall chromosome displacement in *C. elegans* spermatocyte meiosis.

177

### 178 **Spermatocyte meiotic centrosome and spindle dynamics are distinct from that in mitosis**

179 To identify cell-type specific features of centrosomal segregation, we compared spindle pole  
180 dynamics in the two meiotic divisions in spermatocytes to those of the first mitotic division in  
181 one-cell embryos. During mitosis, centrosomes partially or completely disassemble after the  
182 single chromosome segregation event completes (Enos et al., 2018; Magescas et al., 2019).  
183 However, during the two rounds of spermatocyte meiosis, centrosomes must duplicate and  
184 migrate after sisters go to the same pole during meiosis I, then make new connections that allow  
185 sisters to segregate to opposite poles during meiosis II (Albertson and Thomson, 1993; Peters et  
186 al., 2010). Centrosome dynamics that accomplish this are not well understood. We tracked  
187 centrosome dynamics using  $\gamma$ -tubulin::GFP (Hannak et al., 2001; Strome et al., 2001) and found



188 that centrosome size peaks at a volume of  $3 \mu\text{m}^3$  at metaphase I (**Fig. S1A**) (Peters et al.,  
189 2010). After anaphase onset, the centrosome volume decreases rapidly to  $1 \mu\text{m}^3$ . At this point,  
190 the centrosomes flattened out before splitting into two distinct centrosomes (Schwarzstein et al.,  
191 2013), each at a volume of  $\sim 1 \mu\text{m}^3$ . These centrosomes then each migrate 90 degrees around  
192 the segregating autosomes to opposite poles, despite the absence of a nuclear envelope.  
193 Interestingly, the centrosomes remain connected to X chromosome-connected microtubules.  
194 After the X resolves and chromosomes align at metaphase II, the centrosome volume peaks at  
195  $1.3 \mu\text{m}^3$  then slowly decreases during anaphase II (**Fig. S1B**). Thus, the separation and  
196 migration of centrosomes during anaphase I appears to be coordinated with microtubules that  
197 must maintain connections not only to segregating autosomes, but also the lagging X  
198 chromosome.

199 We next compared chromosome and spindle dynamics of *C. elegans* spermatocytes to the one-  
200 cell embryo (**Fig. S2A, Table 1 and 2**) (Farhadifar et al., 2015). Despite the difference in cell and  
201 spindle size and structure, the final chromosome-to-chromosome distance of the spermatocyte  
202 meiotic spindle was  $6.5 \mu\text{m}$  in meiosis I and  $8.0 \mu\text{m}$  in meiosis II compared to the mitotic spindle,  
203 which is  $8.5 \mu\text{m}$  (Nahaboo et al., 2015; Oegema et al., 2001). Spermatocyte meiosis I is slower,  
204 completing in 4-5 minutes compared to mitotic division, which is accomplished over 1.5 min  
205 (**Table 2**). Thus, chromosomes during the first mitotic division in *C. elegans* segregate three  
206 times faster ( $6.5\text{-}7.5 \mu\text{m}/\text{min}$ ) than in spermatocyte meiosis I ( $2.07 \mu\text{m}/\text{min}$ ,  $n = 31$ ) (Nahaboo et  
207 al., 2015; Oegema et al., 2001). During mitotic anaphase, a mid-spindle structure, the central  
208 spindle, forms between the segregating chromosomes (Yu et al., 2019). In contrast, during  
209 spermatocyte meiosis, the lagging X chromosome precludes detection of a similar inter-  
210 chromosomal array of microtubules (**Fig. S3A**). To visualize non-X-connected mid-spindle  
211 microtubule structures, we examined spermatocytes in *tra-2(e1094)* (XX) animals, where paired  
212 X chromosomes do not lag. We detected only a weak fluorescence signal in between the  
213 segregating chromosomes (**Fig. S3B**), not indicative of the prominent central spindle structures

214 observed in mitosis (**Fig. S2A**). Overall, we find that the spermatocyte meiotic spindle, though  
215 smaller and slower than mitotic spindles, can move chromosomes a similar distance.

216

### 217 **Meiotic spindle dynamics are faster in spermatocytes than oocytes**

218 We found spindle dynamics differ dramatically between spermatocytes and oocytes. Meiotic  
219 spindles in *C. elegans* are similarly sized in spermatocytes and oocytes, even though oocyte  
220 meiotic spindles are acentrosomal (Albertson and Thomson, 1993; Dumont et al., 2010; McNally  
221 et al., 2016; Muscat et al., 2015; Redemann et al., 2018). At metaphase the female spindles are  
222 positioned near the embryonic cortex (Fabritius et al., 2011) and are 6-7  $\mu\text{m}$  in length (**Fig. S2B**,  
223 **Table 2**). At anaphase onset, a shortening of pole-to-chromosome distance is observed before a  
224 central array of microtubules forms in between segregating chromosomes to push them apart to  
225 a final distance of 4.5-6  $\mu\text{m}$  (Dumont et al., 2010; Laband et al., 2017; McNally et al., 2016;  
226 Muscat et al., 2015; Redemann et al., 2018; Yu et al., 2019). Both female meiotic divisions  
227 segregated at comparable rates of 0.6-0.8  $\mu\text{m}/\text{min}$  (McNally et al., 2016), which is significantly  
228 slower than spermatocyte meiotic chromosome movement (1.29  $\mu\text{m}/\text{min}$ ). Thus, though  
229 spermatocyte and oocyte spindles are comparably sized, centrosomal spermatocyte spindles  
230 segregate chromosomes twice as fast over a longer distance.

231

### 232 **Kinetochores are not disassembled between spermatocyte meiotic divisions**

233 Kinetochores establish critical connections between chromosomes and microtubules that are  
234 required for chromosome movement. Previous studies in mitosis and oocyte meiosis found the  
235 inner kinetochore proteins CENP-A<sup>HCP-3</sup> (Maddox et al., 2012) and CENP-C<sup>HCP-4</sup> (Moore and  
236 Roth, 2001) form a platform on chromosomes that connects to the outer kinetochore, composed  
237 of the MIS-12 complex (Kline et al., 2006; Petrovic et al., 2016; Petrovic et al., 2010), KNL-1  
238 (Desai et al., 2003; Ghongane et al., 2014), and the NDC-80 complex (Cheerambathur et al.,

239 2017; Kudalkar et al., 2015; Wilson-Kubalek et al., 2016), which interacts with microtubules  
240 (Cheeseman et al., 2006; Ciferri et al., 2008; Wei et al., 2007) (**Fig. 4A**). Kinetochore  
241 components can localize on, surround, or cup the ends of rounded oocyte meiotic chromosomes  
242 (**Fig. 4B**) (Dumont et al., 2010; McNally et al., 2016; Muscat et al., 2015; Shakes et al., 2009).  
243 To identify sperm-specific kinetochore dynamics, we analyzed kinetochore protein localization in  
244 fixed spermatocytes compared to oocytes (**Fig. 4C**).

245 During sperm metaphase I and anaphase I, the inner kinetochore protein CENP-C<sup>HCP-4</sup> is more  
246 concentrated surrounding chromosomes (**Fig. 4B-C**), and CENP-A<sup>HCP-3</sup> is largely absent  
247 (Shakes et al., 2009). In contrast, on oocyte chromosomes CENP-A<sup>HCP-3</sup> and CENP-C<sup>HCP-4</sup> are  
248 both present and uniformly spread on chromosomes (Monen et al., 2005; Shakes et al., 2009).  
249 The outer kinetochore proteins, KNL-1 and KNL-3, localize around sperm chromosomes in  
250 metaphase I (**Fig. 4B-C**), but cup the poleward ends of chromosomes during oocyte meiosis  
251 (Dumont et al., 2010). Further, HIM-10, a member of the NDC-80 complex, surrounds  
252 chromosomes at metaphase I and anaphase I, unlike in oocyte meiosis, where it cups  
253 chromosome ends. Strikingly, during oocyte anaphase I and II, when outer kinetochore protein  
254 levels are greatly reduced, they are retained throughout spermatocyte divisions (**Fig. 4B-C**).  
255 Thus, both inner and outer kinetochore proteins show sperm-specific localization and dynamics,  
256 particularly the retention of outer kinetochore components between meiotic divisions.

257

## 258 **Microtubules attached to the X chromosome exert a pulling force**

259 The retention of kinetochore components on poleward sides of chromosomes during anaphase  
260 suggests that kinetochore-attached microtubules could contribute to pulling chromosomes. To  
261 investigate this, we hypothesized that we could detect tension that would alter the shape of the  
262 lagging X as evidence for pulling forces acting on chromosomes during anaphase separation  
263 (**Fig. 5A**). Using a strain expressing histone H2B::mCherry, we observed the X chromosome

264 was stretched along the spindle axis in early anaphase. As X resolves to one side at late  
265 anaphase, it rounds up (**Fig. 5A**, upper panel). To quantify changes in chromosome geometry,  
266 we calculated a shape coefficient (the ratio of length over diameter) of the X chromosome over  
267 time (**Fig. 5A**, lower panel). With this measure, stretched chromosomes have a shape coefficient  
268 greater than 1. Indeed, the X chromosome is significantly stretched early in anaphase I with a  
269 shape coefficient of 1.4 that decreases to 1.0 as it rounds up in late anaphase I (**Fig. 5B**). This  
270 suggests that the X chromosome is under tension during anaphase I, which is released as the  
271 lagging chromosome resolves to one side.

272 To further assess pulling forces during anaphase, we used laser microsurgery on X  
273 chromosome-attached microtubules. We reasoned a cut on one side of the lagging X would  
274 release tension and induce segregation to the opposite side. Using a  $\beta$ -tubulin::GFP and histone  
275 H2B::mCherry expressing strain, we applied laser point-ablations to the microtubule bundle on  
276 one side of the lagging X. We observed an immediate and continuous movement of the X  
277 chromosome towards the unablated side (**Fig. 5C**, **Movie S4**). The velocity of X chromosome  
278 movement after the cut was variable, similar to unperturbed spindles (**Fig. 5C**, see also cut no.  
279 3). We also tested cutting the microtubule bundles sequentially on each side of the X  
280 chromosome. After initiation of movement by the first cut, the second cut on the opposite side  
281 led to a rapid change in the direction of segregation (**Fig. 5D**, **Movie S5**), indicating that the  
282 direction of X movement can be reversed and that microtubule connections are highly dynamic  
283 during anaphase I.

284 Taken together, we conclude that kinetochore microtubules exert a pulling force on  
285 chromosomes during anaphase. This tension is most obvious on the microtubules connected to  
286 X chromosome, which eventually causes attachments to stochastically break as poles separate,  
287 allowing the X to resolve to the side with more attached microtubules.

288 **Spermatocyte meiotic spindle structure at metaphase is distinct from that in**  
289 **oocyte meiosis**

290 To investigate how microtubules connect to chromosomes during spermatocyte meiosis, we  
291 used large-scale electron tomography (Redemann et al., 2017; Redemann et al., 2018) to  
292 visualize the ultrastructure of whole meiotic spindles with single-microtubule resolution. We  
293 generated 3D models of one spindle at metaphase (**Fig. 6A**), one spindle at anaphase onset  
294 (**Fig. 6B**) and four spindles with increasing pole-to-pole length at anaphase (**Fig. 6C-F**, referred  
295 to as anaphase no. 1-4). For each reconstruction we segmented the autosomes (a), the X  
296 chromosome (x), and the centrioles (**Fig. 6**, left panels). Using criteria applied to previously  
297 described mitotic holocentric kinetochores, microtubules within a ribosome-free zone of 150 nm  
298 around chromosomes were considered kinetochore microtubules (O'Toole et al., 2003;  
299 Redemann et al., 2017). All other microtubules were annotated as spindle microtubules (**Fig. 6**,  
300 mid left panels; mid right panels showing kinetochore microtubules only; **Table 3**). This distance  
301 is in accord with the interaction distance measured by super-resolution light microscopy (**Fig.**  
302 **S4**).

303 Though similarly-sized, round sperm and oocyte chromosomes both adopt a rosette  
304 arrangement surrounding the X chromosome, the meiotic spindle in spermatocytes is distinct  
305 from that of oocytes. During spermatocyte meiotic metaphase I, of the 2406 total number of  
306 microtubules that compose the spindle, 912 (38%) were kinetochore microtubules and 393  
307 (16%) made end-on attachments to chromosomes. This is in contrast to oocyte metaphase  
308 meiotic spindles, which are composed of ~1/3 more microtubules (3662-3812 microtubules)  
309 (Redemann et al., 2018). Of these, 1038-1402 (~32.5%) were kinetochore microtubules and only  
310 131-165 (~4%) of which made end-on attachments. This indicates that round chromosomes can  
311 both be aligned at metaphase in sperm centrosomal and oocyte acentrosomal spindles but using  
312 significantly different ratios of lateral and end-on attachments.

313 **Continuous and lengthening microtubules connect the X chromosome to**  
314 **centrosomes during anaphase I**

315 One phenomenon of spermatocyte meiosis is that microtubules, which connect the chromatids  
316 of the lagging X to opposite spindle poles, lengthen during anaphase I. This is unusual because  
317 in most centrosomal cell-types, microtubules either shorten (anaphase A) or stay the same  
318 length as poles are pulled apart (anaphase B). Further, in *C. elegans* mitosis, continuous  
319 microtubules do not directly connect between centrosomes and chromosomes, but instead  
320 anchor into the spindle network (Redemann et al., 2017). We thus used electron tomography to  
321 determine the continuity of individual X-connected kinetochore microtubules during anaphase I.  
322 We found that microtubules directly connect the X chromosome to each centrosome throughout  
323 anaphase I (see also **Fig. 6A-F**, mid left panels; **Fig. S5**). Further, microtubules with both end-on  
324 and lateral interactions to X remained continuous even as they increased in length until the X  
325 chromosome resolved to one side (**Fig. 6A-F**, right panels; **Fig. S5A-C**, right panels; **Fig. 7A-B**;  
326 **Fig. S6**). Thus continuous microtubules connect the X chromosome to poles even as poles  
327 elongate during anaphase I.

328 We also observed that X-connected microtubules were curved during late anaphase I. To  
329 investigate this, we determined the curvature of X-connected end-on and laterally attached  
330 kinetochore microtubules by measuring the tortuosity of individual microtubules. For this, we  
331 calculated the ratio of the spline length over the end-to-end length (**Fig. 7C**). At metaphase and  
332 anaphase onset, kinetochore microtubules had a tortuosity ratio of one, indicating that the  
333 microtubules were straight. In contrast, X-connected microtubules exhibited higher tortuosity at  
334 anaphase, indicating a higher curvature (**Fig. 7D**). This suggests that other cellular forces,  
335 besides those generated by pulling forces, may also be acting on microtubules connected to the  
336 lagging X during anaphase I.

337 **Segregation of the X chromosome correlates with an asymmetry in the number of**  
338 **attached microtubules**

339 To further characterize the nature of X chromosome lagging and resolution, we examined  
340 tomographic data to determine the total microtubule length in confined volumes on each side of  
341 the X (**Fig. 8A-B**). We determined the ratio of the total microtubule length for each tomographic  
342 data set, which were then plotted according to autosome-to-autosome distance (**Fig. S7A-B**).  
343 We further determined the number of kinetochore microtubules associated with the opposite  
344 hemispheres of the X chromosome and calculated the ratio of these two values (**Fig. 8C-D**). The  
345 ratio of total microtubule length and the ratio of microtubule number is about one in metaphase  
346 and early anaphase, suggesting microtubules are present equally on both sides. As anaphase  
347 progresses, this ratio deviates from one, indicating less microtubules on one of the two sides,  
348 presumably enabling the X chromosome to resolve to the opposing side.

349 To confirm that differences in microtubule content we observed by EM correlate with X  
350 resolution, we tracked microtubules ( $\beta$ -tubulin::GFP) relative to chromosomes (histone  
351 H2B::mCherry) by live-cell imaging (**Fig. 8E**, upper panel). The sum of GFP fluorescence was  
352 measured in a similar volume on each side of the X chromosome over time (**Fig. 8E**, lower  
353 panel). The ratio of the two volumes enabled us to indirectly quantify microtubule content  
354 differences on each side of X. During early anaphase I, the ratio of the volumes was almost one,  
355 indicating a similar amount of microtubules connected to each side. As the X chromosome  
356 segregated to one side over the other, we detected increased intensity on the side the X moved  
357 closer toward (**Fig. 8F**). This indicates an asymmetry in attached microtubules correlates with X  
358 chromosome resolution.

359

360

361

## 362 **Autosomal attached kinetochore microtubules do not shorten during anaphase A**

363 Our live imaging and EM data both show an anaphase A autosome-to-centrosome distance  
364 decrease during anaphase I (**Table 3**). Because a well-described mechanism for anaphase A  
365 (chromosome-to-pole shortening) is microtubule shortening (Asbury, 2017), we analyzed  
366 individual kinetochore microtubule lengths in our 3D EM reconstructions during anaphase. At  
367 metaphase, end-on kinetochore microtubules attached to autosomes were  $0.62 \pm 0.33 \mu\text{m}$  in  
368 length ( $n = 360$ ) (**Fig. 9A**), while laterally attached microtubules were much longer, at  $1.15 \pm$   
369  $0.59 \mu\text{m}$  ( $n = 480$ ) (**Fig. 9B**). Unexpectedly, we observed that end-on kinetochore microtubules  
370 did not shorten as anaphase I progressed, remaining at  $0.63 \pm 0.42 \mu\text{m}$  ( $n = 687$ ). Thus, unlike  
371 in other systems, the anaphase A we observe in spermatocyte meiosis is not due to shortening  
372 of end-on attached kinetochore microtubules (Asbury, 2017).

373

## 374 **Tension release across the spindle may contribute to autosomal anaphase A**

375 To account for anaphase A in spermatocyte meiosis, we hypothesized that features of spindle  
376 geometry and shape could contribute to the decrease in chromosome-to-centrosome distance.  
377 We thus analyzed changes in the shape of chromosomes, centrosomes, and the interaction  
378 angles of kinetochore microtubules with the autosomes over the course of anaphase that could  
379 contribute to this decrease.

380 First, to examine the contribution of chromosome stretch, we measured individual autosome  
381 expansion along the spindle axis by plotting the cross-sectional areas over the chromosome  
382 distance. This generates a stretch value we call the Full Width at Half-Maximal or FWHM (**Fig.**  
383 **10A**; see experimental procedures). Autosomes are stretched most at metaphase (FWHM:  $0.73$   
384  $\pm 0.13 \mu\text{m}$ ;  $n = 10$ ) (**Fig. 10B**). As chromosomes separate farther apart, autosomes round up to  
385 a FWHM of  $0.56 \pm 0.06 \mu\text{m}$ , about 23% less compared to metaphase, thereby moving the  
386 chromosome centers closer to the poles. Thus, the stretching of chromosomes induced by



387 metaphase alignment that is released during anaphase progression accounts for a portion of  
388 anaphase A pole-chromosome shortening.

389 Second, we considered the distance between chromosomes and the centriole as centrosomes  
390 change shape as it splits (**Fig. S2**). The shift from a spherical to a stretched organelle could  
391 account for spindle poles moving closer to chromosomes. We measured the distance of the plus  
392 end of the kinetochore microtubules to the closest centriole and found it significantly shortened  
393 from metaphase ( $0.99 \pm 0.27 \mu\text{m}$ ) to anaphase ( $0.79 \pm 0.21 \mu\text{m}$ ) (**Fig. 10C**), resulting in  
394 autosomes being 20% closer to centrioles (**Fig. 10D**).

395 Third, we hypothesized tension release would also alter the angle of attachment of end-on  
396 kinetochore microtubules with autosomes, bringing chromosomes closer to spindle poles. We  
397 thus determined the attachment angle between each kinetochore microtubule plus-end at the  
398 chromosome surface and each centrosome-chromosome axis (**Fig. 10E**). The angle at  
399 metaphase was  $36.8^\circ \pm 31.0^\circ$ . Concomitant with a rounding up of the autosomes, the  
400 attachment angle increased to  $58.8^\circ \pm 33.8^\circ$ , bringing chromosomes closer to poles during  
401 anaphase (**Fig. 10F**). Simple trigonometric calculations with a constant microtubule length of  
402  $0.63 \mu\text{m}$  found this increase contributes to  $0.17 \mu\text{m}$  shortening in chromosome to pole distance.

403 In sum, we developed analyses to identify three different factors that can contribute to pole-  
404 chromosome shortening during anaphase: 1) the loss of tension at the chromosomes after  
405 anaphase onset, which shortens the chromosome by about  $0.34 \mu\text{m}$ ; 2) changes in centrosome  
406 size and shape that contributes about  $0.2 \mu\text{m}$ ; and 3) the opening of the attachment angle that is  
407 about  $0.17 \mu\text{m}$ . All these factors comprise about ~70% of the total  $\sim 1 \mu\text{m}$  shortening of the  
408 chromosome-to-pole distance observed in spermatocyte meiosis (**Fig. S8A-I**), though this may  
409 be underestimated due to limitations in the tomographic reconstruction from serial semi-thick  
410 sections. Overall, our ultrastructure analysis revealed previously unknown, alternative  
411 mechanisms that contribute to anaphase-A movement.

## 412 **Discussion**

413 Prior to this work, few studies addressed the spindle architecture that segregates chromosomes  
414 during male meiosis, a fundamental factor in sperm production (LaFountain et al., 2011;  
415 LaFountain et al., 2012; Nicklas and Kubai, 1985; Nicklas et al., 2001; Zhang and Nicklas,  
416 1995). Here the combination of live imaging and 3D ultrastructure in *C. elegans* enabled us to  
417 define specific features of chromosome dynamics and spindle organization that are regulated in  
418 sex-specific ways to produce different cell types.

419

### 420 **A distinct form of anaphase A without shortening of kinetochore microtubules**

421 Surprisingly, the single-microtubule resolution of electron tomography revealed the length of  
422 autosome-attached kinetochore microtubules is constant during sperm anaphase. This is in  
423 contrast to the kinetochore microtubule shortening typically associated with anaphase A  
424 observed by light microscopy in many systems (Asbury, 2017). We developed methods to  
425 analyze ultrastructural data to identify three contributors to the anaphase A in *C. elegans*  
426 spermatocyte meiosis (**Fig. 11A**). First, stretched autosomes at metaphase relax from tension  
427 released by separase-mediated cleavage of cohesins during anaphase, resulting in autosome  
428 shape change (Severson and Meyer, 2014). Second, live imaging revealed spindle poles  
429 decrease in size and change shape as centrioles split. Analysis of our ultrastructural data  
430 revealed that this results in a shorter distance between microtubule ends and the centrioles.  
431 Third, microtubule ends on round chromosomes shift from a central to more peripheral position  
432 during anaphase, resulting in a decrease in the microtubule-to-pole distance. This might be  
433 induced by minus-end associated motor proteins such as dynein (Schmidt et al., 2005; Schmidt  
434 et al., 2017). All three factors change the relative position of centrosomes, autosomes and  
435 kinetochore microtubules to one another. Such changes in the relative positioning without  
436 kinetochore microtubule shortening represent a novel type of centrosomal anaphase A

437 movement that can now be considered when analyzing chromosome movement in different  
438 system and interrogated by the methods we describe.

439

#### 440 **Role of pulling forces during anaphase**

441 The spermatocyte meiotic spindle shows two dramatic molecular distinctions during anaphase I  
442 that indicate pulling forces are critical to efficiently segregate chromosomes. First, outer  
443 kinetochore proteins are retained for the duration of both divisions. This is in contrast to mitosis  
444 and oocyte meiotic anaphase, where kinetochore levels diminish dramatically during anaphase  
445 progression (Asbury, 2017). Second, microtubules do not disassemble but instead remain  
446 attached to spermatocyte chromosomes, providing a stable connection to transmit the forces  
447 from poles needed to pull chromosomes apart. Indeed, we detected these end-on attached  
448 microtubules connections on the lagging X chromosome, which are subjected to pulling forces  
449 as poles move apart (**Fig. 5**).

450 Our results also suggest that *C. elegans* spermatocyte meiosis may not rely on a classical inter-  
451 chromosomal microtubule structure, or central spindle, for chromosome movement (Scholey et  
452 al., 2016). Acentrosomal oocyte meiosis (Dumont et al., 2010; Laband et al., 2017; Redemann et  
453 al., 2018; Yu et al., 2019) and centrosomal embryonic mitosis (Nahaboo et al., 2015; Yu et al.,  
454 2019), exhibit inter-chromosomal microtubules that push chromosomes apart. In contrast, in  
455 spermatocyte meiosis we see two distinct patterns. In XO males, the spindle midzone is  
456 dominated by a microtubule bridge connecting the unpaired X chromosome to the poles (**Fig. 1**  
457 **and 6**). In XX hermaphrodites, *tra-2(e1090)* mutant males, or meiosis II, we observed few inter-  
458 chromosomal microtubules between the paired chromosomes (**Fig. S3B**). The absence of a  
459 classical inter-chromosomal microtubule structure may suggest a reliance on molecular  
460 components that generate pulling forces at the cellular cortex (Grill et al., 2003). We speculate  
461 this reliance may have evolved to help reliably resolve a lagging chromosome during anaphase

462 I. Nonetheless, our results indicate that different cell types within a single organism distinctly  
463 regulate kinetochore and spindle structure to balance pulling and pushing of chromosomes in  
464 different contexts.

465

#### 466 **Resolution of lagging chromosomes during sperm meiosis**

467 Our studies reveal new features of the dynamics of chromosome lagging and resolution. We find  
468 continuous microtubules attach to each side of the lagging X chromosome throughout anaphase

469 I. How do these microtubules lengthen? In one scenario, kinetochore microtubules could grow at  
470 their plus ends. As the spindle poles move apart, microtubule growth at a similar rate to spindle  
471 elongation could maintain association of kinetochore microtubules to the X chromosome.  
472 Alternatively, if the net growth rate of kinetochore microtubules exceeds the rate of spindle  
473 elongation, microtubules could attach laterally to the X, thus allowing minus-end directed  
474 interaction with motor proteins such as dynein (Reck-Peterson et al., 2018). Such a scenario  
475 could also explain the bending of microtubules we observed, possibly driven by dynein as it  
476 becomes processive towards the microtubule minus-end (Schmidt et al., 2005; Schmidt et al.,  
477 2017). As we find both end-on and laterally attached microtubules on the lagging X (**Fig. 7D**),  
478 their exact contributions to the segregation process remain to be determined.

479 A final question is how the lagging X chromosome resolves during anaphase I. We propose an  
480 imbalance of pulling forces that results stochastically via a continuous attachment and  
481 detachment of kinetochore microtubules. In such a ‘tug-of-war’ model, the side that maintains  
482 more connections to X wins, enabling resolution to one pole (**Fig. 11B**). Indeed, our EM and light  
483 microscopy data supports this model (**Fig. 8**). Such a tug-of-war mechanism has been  
484 suggested during chromosomal oscillations at mitotic prometaphase and metaphase (Ault et al.,  
485 1991; Skibbens et al., 1993; Soppina et al., 2009) with chromokinesins and dynein as possible  
486 candidates for switching the direction of the oscillations (Sutradhar and Paul, 2014).

487 *In toto*, our approach of combining cellular imaging within living males and quantification of 3D  
488 ultrastructure of staged spindles lays the groundwork for further studies on molecular  
489 mechanisms of chromosome segregation and provides analytical tools for biophysical analyses  
490 on spindles in a broad range of contexts (Fabig et al., 2016; Shakes et al., 2011; Winter et al.,  
491 2017). For example, many species have evolved distinct spindle and segregation strategies to  
492 resolve unequal numbers of sex chromosomes (Fabig et al., 2016). Recent work has also shown  
493 that segregation in cells with aneuploidy and chromosomal abnormalities are potential drivers of  
494 infertility (Barri et al., 2005; Garcia-Mengual et al., 2019; Hassold and Hunt, 2001; Ioannou and  
495 Tempest, 2015) and cancer progression (Bolhaqueiro et al., 2019; Chunduri and Storchova,  
496 2019; Ly et al., 2019). Our studies can thus impact the understanding of partition mechanisms  
497 that can segregate both paired and lagging chromosomes to efficiently and reliably generate  
498 haploid sperm.

499

## 500 **Experimental procedures**

### 501 **Strains and worm handling**

#### 502 Strains

503 The following strains were used in this study: N2 wild type (Brenner, 1974); MAS91 (unc-  
504 119(ed3) III; *ItIs37*[pAA64; *pie-1::mCherry::HIS58*]; *ruls57*[*pie-1::GFP::tubulin* + *unc-119(+)*])  
505 (Han et al., 2015); MAS96 (unc-119(ed3) III; *ddIs6*[*tbg-1::GFP* + *unc-119(+)*]; *ItIs37*[pAA64; *pie-*  
506 *1::mCherry::HIS-58* + *unc-119(+)*] IV, *qals3507*[*pie-1::GFP::LEM-2* + *unc-119(+)*]) (M. Srayko,  
507 Alberta); TMR17 (unc-119(ed3) III; *ddIs6*[*tbg-1::GFP* + *unc-119(+)*]; *ItIs37*[pAA64; *pie-*  
508 *1::mCherry::HIS-58* + *unc-119(+)*] IV) (this study); TMR18 (*him-8(e1489)* IV; *unc-119(ed3)* III;  
509 *ddIs6*[*tbg-1::GFP* + *unc-119(+)*]; *ItIs37*[pAA64; *pie-1::mCherry::HIS-58* + *unc-119(+)*] IV) (this  
510 study); TMR26 (*zim-2 (tm574)* IV; *unc-119(ed3)* III; *ddIs6*[*tbg-1::GFP* + *unc-119(+)*];  
511 *ItIs37*[pAA64; *pie-1::mCherry::HIS-58* + *unc-119(+)*] IV) (this study); XC110 (*tra-2(e1094)/dpy-*  
512 *10(e128)* II; *unc-119(ed3)* III; *ItIs37*[pAA64; *pie-1::mCherry::HIS58*] (IV); *ruls57*[*pie-*  
513 *1::GFP::tubulin* + *unc-119(+)*] (this study); XC116 (*tra-2(e1094)/dpy-10(e128)* II; *ddIs6*[*tbg-*  
514 *1::GFP* + *unc-119(+)*]; *ItIs37*[pAA64; *pie-1::mCherry::HIS-58* + *unc-119(+)*] IV) (this study);  
515 SP346 (tetraploid, 4n) (Madl and Herman, 1979).

#### 516 Worm handling

517 Worms were grown on nematode growth medium (NGM) plates at 20°C with *E. coli* (OP50) as a  
518 food source (Brenner, 1974). Male worms were produced by exposing L4 hermaphrodites to  
519 30°C for 4-6 h and checking the resulting progeny for male worms after three days (Sulston and  
520 Hodgkin, 1988). Males were maintained by mating 20-30 male worms with five L4  
521 hermaphrodites. Triploid worms were obtained by mating tetraploid hermaphrodites with males  
522 of either MAS91 or TMR17. F1 male animals were selected and imaged as described below.

523

524

## 525 **Light microscopy and analysis of spindle dynamics**

### 526 Light microscopy

527 Age-synchronized males (3 d after bleaching adult hermaphrodites fertilized by males) were  
528 placed in droplets of 1  $\mu$ l polystyrene microbeads solution (bead diameter of 0.1  $\mu$ m;  
529 Polysciences, USA) on 10% agarose pads. Samples were then covered with a coverslip and  
530 sealed with wax (Kim et al., 2013). For a comparative analysis of mitotic and female meiotic  
531 embryos, 3 d old hermaphrodites were dissected in M9 buffer and transferred to 4% agarose  
532 pads. We used a confocal spinning disk microscope (IX 83, Olympus, Japan) equipped with a  
533 60x 1.2 NA water immersion objective and an EMCCD camera (iXon Ultra 897, Andor, UK) for  
534 live-cell imaging. The meiotic region within single males was imaged for about one hour and a z-  
535 stack was recorded either every 20 s or 30 s. Z-stacks for embryos were recorded every 20 s for  
536 about 1 h. Images were then corrected for photobleaching using the Fiji software package  
537 (Schindelin et al., 2012).

### 538 Analysis of spindle dynamics

539 Image stacks were analyzed with the Arivis Vision4D software package (arivis AG, Germany).  
540 Individual spindles were cropped and spindle poles in each frame were segmented by  
541 thresholding. The Euclidean distance of the center of mass of both spindle poles was then  
542 calculated for each time point. For the production of kymographs, the original image data was  
543 resampled with a custom-made python script in arivis Vision4D. The spindle axes were rotated  
544 in all three dimensions to align the axis along the z-direction. As a consequence each spindle  
545 had a comparable orientation with an isotropic voxel size of 0.1  $\mu$ m and a radius of 0.9  $\mu$ m  
546 around the spindle axis. All voxels were then recalculated based on the initial transformation of  
547 the axis with an extrapolation of 1  $\mu$ m at each pole in the direction of the axis. As the axes of the  
548 spindles were chosen to lay in the z-dimension all images in the resampled datasets were laying  
549 orthogonally to it (x, y-plane). For the calculation of kymographs, the Gaussian weighted sum of  
550 fluorescence in each plane was calculated along the spindle axis and repeated for all time

551 points. For the analysis of chromosome movements, the peak maxima of the chromosome  
552 fluorescence signals were then used to calculate the distances for each time point. Individual  
553 measurements were aligned according to the onset of anaphase and the mean distance was  
554 then calculated and plotted against time relative to anaphase onset. For characterizing the  
555 dynamic properties of spindles these mean values were then used to determine spindle length at  
556 metaphase and after anaphase. The initial speed of spindle elongation and chromosome  
557 movement was calculated by fitting a linear function to the measurements during the first minute  
558 after anaphase onset as the segregation speed slowed down continuously.

559 To illustrate the process of division, the spindles were resampled and rotated as described  
560 above but with a radius of 3  $\mu\text{m}$  around the spindle axis and an extrapolation of 2  $\mu\text{m}$  after the  
561 spindle poles. Then an y,z-projection over x (maximum intensity) was calculated for each time  
562 point to display the resampled volume as a plane image (**Fig. 1-3**). For a comparison of  
563 microtubule density on both sides of the X chromosome facing the spindle poles, the sum of  
564 fluorescence was calculated within two cubic boxes (with a similar volume of 1  $\mu\text{m}^3$ ) adjacent to  
565 the X chromosome in the resampled light microscopic image data. The box on the side, where  
566 the chromosome moved to at the time of segregation, was termed “volume 1”, the other “volume  
567 2”. The ratio between both values at each time point indirectly describes the difference in the  
568 number of microtubules (**Fig. 8E-F**).

569 For each data set, the visco-elastic property of the X chromosome was probed by segmenting it  
570 in a resampled 3D dataset and measuring its dimensions. Along the spindle axis, the length of  
571 the X chromosome was measured (z-dimension). Orthogonal to the x-axis, the mean values for  
572 the x- and y-dimension were calculated. A shape coefficient was then calculated ( $z/[(x+y)/2]$ ) to  
573 illustrate the change of the shape of the X chromosome over time (**Fig. 5A-B**).

574 The centrosomes were segmented in 3D image data from worms expressing  $\gamma$ -tubulin::GFP and  
575 histone H2B::mCherry with the Arivis Vision4D software package by applying a cut-off threshold



576 to the 3D image data. All fluorescence signals above the threshold were included in the segment  
577 of the centrosomes. The volume of the segments was then calculated for each frame and each  
578 centrosome individually for spindles in meiosis I and II. When centrosomes split in meiosis I and  
579 could be segmented individually both volumes were summed together for the respective frame  
580 **(Fig. S1)**.

581

## 582 **Immunostaining for light microscopy**

583 For antibody staining of *C. elegans* gonads, synchronized males were dissected and fixed in 1%  
584 paraformaldehyde using established protocols (Howe et al., 2001). Methanol/acetone fixation  
585 was used for immunolabeling of mitotic and meiotic embryos (Shakes et al., 2009). Primary and  
586 secondary antibodies were diluted in blocking buffer (PBS + 0.1% Tween 20 and 10 mg/ml BSA)  
587 and staining was conducted at room temperature in a humid chamber. Primary antibodies were  
588 used in overnight incubations (unless otherwise noted). Commercial sources or labs kindly  
589 providing antibodies were as listed: 1:200 mouse anti-NDC-80 (Novus Biologicals, catalog  
590 #42000002); 1:200 mouse anti- $\alpha$ -tubulin (DM1A Sigma-Aldrich, catalog #T6199); 1:500 rabbit  
591 anti-KNL-1 (Desai et al., 2003); 1:500 rabbit anti-KNL-3 (Cheeseman et al., 2005); 1:400 rabbit  
592 anti-CENP-C<sup>HCP-4</sup> (Moore et al., 2005); 1:400 rabbit anti-HIM-10 (Skop et al., 2001); and 1:50  
593 FITC-conjugated anti- $\alpha$ -tubulin (Sigma-Aldrich, #F2168). Secondary antibodies included: goat  
594 anti-rabbit AlexaFluor 488-labeled IgG (used at 1:200); goat anti-mouse AlexaFluor 488-labeled  
595 IgG (used at 1:200); goat anti-mouse AlexaFluor 564-labeled IgG (used at 1:200); and donkey  
596 anti-rabbit Cy3 (used at 1:500). DNA was visualized using DAPI at 0.1  $\mu$ g/ml. Slides were  
597 prepared by using VectaShield (Vector Labs, USA) as a combined mounting and anti-fade  
598 medium. Confocal images were acquired using a Zeiss LSM710 microscope with Zen software  
599 **(Fig. 4)**. Super-resolution images were collected using an OMX 3D-SIM microscope (GE  
600 Healthcare, USA) with an Olympus (Shinjuku, Japan) 100x UPlanSApo 1.4 NA objective  
601 (Olympus, Japan). Images were captured in z-steps of 0.125  $\mu$ m and processed using

602 SoftWoRx (GE Healthcare, USA) and IMARIS (Bitplane, Switzerland) 3D imaging software (**Fig.**  
603 **S4**).

604

### 605 **Laser microsurgery**

606 Age-synchronized males (3d old) were placed within a of droplet of 1  $\mu$ l M9 buffer containing  
607 1mM levamisole and 0.1  $\mu$ m polystyrene microbeads (Polysciences, USA) on a 10 % agarose  
608 pad. Samples were then covered with a coverslip and sealed with wax. For imaging during laser  
609 microsurgery, we used a confocal spinning disk microscope (Ti Eclipse, Nikon, Japan) equipped  
610 with a 60x 1.2 NA water immersion objective, a 1.5x optovar, an EMCCD camera (iXon Ultra  
611 897, Andor, UK) and a mode-locked femtosecond Ti:sapphire laser (Chameleon Vision II,  
612 Coherent, USA) operated at a wavelength of 800 nm. After locating spindles in anaphase I within  
613 males, a single image was recorded in intervals of 1 s. Subsequently, a position for the laser cut  
614 was chosen and a single spot with a diameter of about 1.3  $\mu$ m was ablated with a laser power of  
615 150 mW and an exposure time of 30 ms. Image acquisition was continued until the X  
616 chromosome had been fully segregated (**Fig. 5C-D**). For further analysis the images were  
617 corrected for photobleaching within the Fiji software package and corrected for movement using  
618 the plugin “image stabilizer” ([http://www.cs.cmu.edu/~kangli/code/Image\\_Stabilizer.html](http://www.cs.cmu.edu/~kangli/code/Image_Stabilizer.html);  
619 February 2008).

620

### 621 **Specimen preparation for electron microscopy**

622 Males were ultra-rapidly frozen using a HPF COMPACT 01 high-pressure freezer (Engineering  
623 Office M. Wohlwend, Sennwald, Switzerland). For each freezing run, five individuals were placed  
624 in a type-A aluminum planchette (100  $\mu$ m deep; Wohlwend, article #241) pre-wetted with  
625 hexadecene (Merck) and then filled with M9 buffer containing 20% (w/v) BSA (Roth, Germany).  
626 The specimen holders were closed by gently placing a type-B aluminum planchette (Wohlwend,

627 article #242) with the flat side facing the sample on top of a type-A specimen holder. The  
628 sandwiches were frozen under high pressure (~2000 bar) with a cooling rate of ~20000°C/s  
629 (Fabig et al., 2019). Specimen holders were opened under liquid nitrogen and transferred to  
630 cryo-vials filled with anhydrous acetone containing 1% (w/v) osmium tetroxide (EMS) and 0.1%  
631 (w/v) uranyl acetate (Polysciences, USA). Freeze substitution was performed in a Leica AFS  
632 (Leica Microsystems, Austria). Samples were kept at -90°C, then warmed up to -30°C with steps  
633 of 5°C/h, kept for 5 h at -30°C and warmed up again (steps of 5°C/h) to 0°C. Subsequently,  
634 samples were washed three times with pure anhydrous acetone and infiltrated with  
635 Epon/Araldite (EMS, USA) epoxy resin at increasing concentrations of resin (resin:acetone: 1:3,  
636 1:1, 3:1, then pure resin) for 2h each step at room temperature (Muller-Reichert et al., 2003).  
637 Samples were incubated with pure resin over night and then for 4 h. For thin-layer embedding  
638 samples were placed between two Teflon-coated glass slides and allowed to polymerize at 60°C  
639 for 48 h (Muller-Reichert et al., 2008). Polymerized samples were remounted on dummy blocks  
640 and semi-thin serial sections (300 nm) were cut using an EM UC6 (Leica Microsystems, Austria)  
641 ultramicrotome. Ribbons of sections were collected on Formvar-coated copper slot grids, post-  
642 stained with 2% (w/v) uranyl acetate in 70% (v/v) methanol and 0.4% (w/v) lead citrate and  
643 allowed to dry prior to inspection.

644

## 645 **Electron tomography, microtubule segmentation and stitching of data sets**

646 In preparation for electron tomography, both sides of the samples were coated with 15 nm-  
647 colloidal gold (BBI, UK). To select cells in meiosis, serial sections were pre-inspected at low  
648 magnification (~2900x) using a Zeiss EM906 transmission electron microscope (Zeiss,  
649 Germany) operated at 80 kV. Serial sections containing cells/regions of interest were then  
650 transferred to a Tecnai F30 transmission electron microscope (ThermoFischer Scientific, USA)  
651 operated at 300 kV and equipped with a US1000 CCD camera (Gatan, USA). Tilt series were  
652 acquired from -65° to +65° with 1° increments at a magnification of 4700x. Specimens were then

653 rotated 90° to acquire a second tilt series for double-tilt electron tomography (Mastronarde,  
654 1997). Electron tomograms were calculated using the IMOD software package (Kremer et al.,  
655 1996). As previously described (Redemann et al., 2014; Weber et al., 2012), microtubules  
656 were automatically segmented using the ZIBAmira (Zuse Institute Berlin, Germany) software  
657 package (Stalling et al., 2005).

658 Individual tomograms were then stitched and combined (Weber et al., 2014) to represent whole  
659 microtubule networks in 3D models (Redemann et al., 2017). Chromosomes, kinetochores and  
660 centrioles were manually segmented. Kinetochores were modeled around each chromosome by  
661 gradually increasing the chromosome volume until the area of the ribosome-free zone around  
662 each chromosome (Howe et al., 2001; O'Toole et al., 2003) was covered, giving a thickness of  
663 the male meiotic holocentric kinetochore of about 150 nm.

664

## 665 **Analysis of tomographic data**

### 666 Classification of microtubules

667 First, the distance between each point of a microtubule segment and the closest point of the  
668 surface of individual chromosomes was calculated. Only microtubules within a distance of  
669 150 nm or less were considered kinetochore microtubules as this distance was measured to be  
670 the approximate extent of the kinetochore in the electron tomograms. The kinetochore is visible  
671 in the electron tomograms as a less stained region around the chromosomes (Howe et al.,  
672 2001). Additionally, each kinetochore microtubule was assigned to the X chromosome or to one  
673 of the autosomal chromosomes according to its closest distance to the chromosome surface. As  
674 microtubules in anaphase pass between the autosomes and attach to the X chromosome after  
675 that, they were first checked for an interaction with the X chromosome and if there was none,  
676 further analysis was performed to check for a potential autosomal interaction. For each  
677 chromosome the microtubule interactions were subdivided between end-on and lateral. We

678 defined an end-on association by extrapolating the microtubule after its end for 150 nm and  
679 checking if this extrapolated line was cutting the surface of the chromosome. If that criterion was  
680 not met, we considered the association of the microtubule with the given chromosome as lateral.

#### 681 Length distribution

682 Furthermore, we analyzed the length distribution of microtubules. The length distribution for each  
683 microtubule class in each meiotic spindle is presented as a violin plots in order to assess the  
684 mean, standard deviation as well as the distribution of the data. For that, individual data points  
685 were binned into 25 intervals and the width of the plot was normalized to equalize relative  
686 densities within the individual datasets. Further, the mean and the standard deviation were  
687 shown and the variance among the datasets was compared using a one-way analysis of  
688 variance (ANOVA; **Fig. 10, Fig. S6, Fig. S8**).

689 We also analyzed the ratio of the sum of microtubule length between two defined volumes  
690 analogous to the analysis of the light microscopic data. For that a box of  $1 \mu\text{m}^3$  was placed on  
691 either side of the X chromosome facing the spindle poles. The microtubules within this box were  
692 extracted and their length was measured and summed up. The ratio of the box closer to the  
693 respective pole against the second box was calculated (**Fig. 8A-B**). The microtubule tortuosity  
694 (microtubule spline length divided by end-end length; **Fig. 7C-D**) was measure for end-on and  
695 lateral microtubules in contact with the X chromosome.

#### 696 Chromosome shape

697 Further, we analyzed the shape of the chromosomes in the EM data as previously described  
698 (Lindow et al., 2018). In brief, chromosomes were manually segmented and along the pole-to-  
699 pole axis of the spindle orthogonal planes were placed with 10 nm spacing. For every plane the  
700 area was calculated that intersects the individual chromosome surface. After plotting the area  
701 against the pole-pole distance a Gaussian function containing five terms was fit with MATLAB

702 (MATLAB 2017b, The MathWorks, USA) and the full width at half maximum (FWHM) for each  
703 chromosome was determined and compared (**Fig. 10A-B**).

704 For measuring the distance between centrioles and the end-on microtubule end at the  
705 autosomes, we first selected the closest centriole at the putative microtubule minus-end. Then  
706 we extracted the position of the respective putative plus-end and calculated the Euclidean  
707 distance between the centriole and the putative plus-end (**Fig. 10C-D**).

708 The angle between the microtubule plus-end and the chromosome-centrosome axis was  
709 determined by calculating the vector between the respective chromosome and the centrosome  
710 and the vector between chromosome and the respective end. Then the angle between both  
711 vectors was calculated (**Fig. 10E-F**).

712

713 **Declaration of interests**

714 The authors declare no competing financial interests.

715

716 **Acknowledgements**

717 The authors would like to thank Dr. Michael Laue (RKI, Berlin, Germany) for using the  
718 COMPACT 01 (Wohlwend) high-pressure freezer, the Core Facility Cellular Imaging of the  
719 Faculty of Medicine Carl Gustav Carus (TU Dresden, Germany) and the light- and electron  
720 microscopy facilities at the MPI-CBG (Dresden, Germany) for technical assistance. We are also  
721 grateful to Drs. Diane Shakes (Williamsburg VA, USA), Stefanie Redemann (Charlottesville VA,  
722 USA) and Kevin O'Connell (Bethesda MD, USA) for a critical reading of the manuscript. We  
723 would like to thank Martin Merkel, Ewa Kania and Sophia May for help in tomographic  
724 reconstruction and microtubule segmentation. The authors are grateful to Falko Löffler, Carola  
725 Bender and Christian Götze (Arivis AG) for help with image processing in arivis Vision4D. Some  
726 strains were provided by the CGC, which is funded by NIH Office of Research Infrastructure  
727 Programs (P40 OD010440). We acknowledge NIH grant NIH1S10OD024988-01 for the  
728 purchase on the OMX microscope. Work in the Müller-Reichert laboratory is supported by funds  
729 from the Deutsche Forschungsgemeinschaft (MU 1423/10-1). R.K. received funding from the  
730 European Union's Horizon 2020 research and innovation program under the Marie Skłodowska-  
731 Curie grant agreement No. 675737 (grant to T.M.R.). Work in the Chu lab is supported by the  
732 NIH grant R03 HD093990-01A1 and the NSF Awards RUI-1817611 and DBI-1548297.

733

734

## 735 References

- 736 Albertson, D.G. 1984. Formation of the first cleavage spindle in nematode embryos. *Dev Biol.* 101:61-72.
- 737 Albertson, D.G., and J.N. Thomson. 1993. Segregation of holocentric chromosomes at meiosis in the  
738 nematode, *Caenorhabditis elegans*. *Chromosome Res.* 1:15-26.
- 739 Asbury, C.L. 2017. Anaphase A: Disassembling Microtubules Move Chromosomes toward Spindle Poles.  
740 *Biology (Basel)*. 6.
- 741 Ault, J.G., A.J. DeMarco, E.D. Salmon, and C.L. Rieder. 1991. Studies on the ejection properties of  
742 asters: astral microtubule turnover influences the oscillatory behavior and positioning of mono-  
743 oriented chromosomes. *J Cell Sci.* 99 ( Pt 4):701-710.
- 744 Barri, P.N., J.M. Vendrell, F. Martinez, B. Coroleu, B. Aran, and A. Veiga. 2005. Influence of  
745 spermatogenic profile and meiotic abnormalities on reproductive outcome of infertile patients.  
746 *Reprod Biomed Online.* 10:735-739.
- 747 Bennabi, I., M.E. Terret, and M.H. Verlhac. 2016. Meiotic spindle assembly and chromosome segregation  
748 in oocytes. *J Cell Biol.* 215:611-619.
- 749 Bolhaqueiro, A.C.F., B. Ponsioen, B. Bakker, S.J. Klaasen, E. Kucukkose, R.H. van Jaarsveld, J. Vivie, I.  
750 Verlaan-Klink, N. Hami, D.C.J. Spierings, N. Sasaki, D. Dutta, S.F. Boj, R.G.J. Vries, P.M.  
751 Lansdorp, M. van de Wetering, A. van Oudenaarden, H. Clevers, O. Kranenburg, F. Foijer, H.J.G.  
752 Snippert, and G. Kops. 2019. Ongoing chromosomal instability and karyotype evolution in human  
753 colorectal cancer organoids. *Nat Genet.* 51:824-834.
- 754 Brenner, S. 1974. The genetics of *Caenorhabditis elegans*. *Genetics.* 77:71-94.
- 755 Cheerambathur, D.K., B. Prevo, N. Hattersley, L. Lewellyn, K.D. Corbett, K. Oegema, and A. Desai.  
756 2017. Dephosphorylation of the Ndc80 Tail Stabilizes Kinetochores-Microtubule Attachments via  
757 the Ska Complex. *Dev Cell.* 41:424-437 e424.
- 758 Cheeseman, I.M., J.S. Chappie, E.M. Wilson-Kubalek, and A. Desai. 2006. The conserved KMN network  
759 constitutes the core microtubule-binding site of the kinetochore. *Cell.* 127:983-997.
- 760 Cheeseman, I.M., I. MacLeod, J.R. Yates, 3rd, K. Oegema, and A. Desai. 2005. The CENP-F-like proteins  
761 HCP-1 and HCP-2 target CLASP to kinetochores to mediate chromosome segregation. *Current*  
762 *biology : CB.* 15:771-777.
- 763 Chunduri, N.K., and Z. Storchova. 2019. The diverse consequences of aneuploidy. *Nat Cell Biol.* 21:54-  
764 62.
- 765 Ciferri, C., S. Pasqualato, E. Screpanti, G. Varetto, S. Santaguida, G. Dos Reis, A. Maiolica, J. Polka, J.G.  
766 De Luca, P. De Wulf, M. Salek, J. Rappsilber, C.A. Moores, E.D. Salmon, and A. Musacchio.  
767 2008. Implications for kinetochore-microtubule attachment from the structure of an engineered  
768 Ndc80 complex. *Cell.* 133:427-439.
- 769 Crowder, M.E., M. Strzelecka, J.D. Wilbur, M.C. Good, G. von Dassow, and R. Heald. 2015. A  
770 comparative analysis of spindle morphometrics across metazoans. *Current biology : CB.* 25:1542-  
771 1550.
- 772 Desai, A., S. Rybina, T. Muller-Reichert, A. Shevchenko, A. Shevchenko, A. Hyman, and K. Oegema.  
773 2003. KNL-1 directs assembly of the microtubule-binding interface of the kinetochore in *C.*  
774 *elegans*. *Genes Dev.* 17:2421-2435.
- 775 Dumont, J., and A. Desai. 2012. Acentrosomal spindle assembly and chromosome segregation during  
776 oocyte meiosis. *Trends Cell Biol.* 22:241-249.
- 777 Dumont, J., K. Oegema, and A. Desai. 2010. A kinetochore-independent mechanism drives anaphase  
778 chromosome separation during acentrosomal meiosis. *Nat Cell Biol.* 12:894-901.
- 779 El Yakoubi, W., and K. Wassmann. 2017. Meiotic Divisions: No Place for Gender Equality. *Advances in*  
780 *experimental medicine and biology.* 1002:1-17.
- 781 Enos, S.J., M. Dressler, B.F. Gomes, A.A. Hyman, and J.B. Woodruff. 2018. Phosphatase PP2A and  
782 microtubule-mediated pulling forces disassemble centrosomes during mitotic exit. *Biol Open.* 7.
- 783 Fabig, G., T. Muller-Reichert, and L.V. Paliulis. 2016. Back to the roots: segregation of univalent sex  
784 chromosomes in meiosis. *Chromosoma.* 125:277-286.



- 785 Fabig, G., A. Schwarz, C. Striese, M. Laue, and T. Müller-Reichert. 2019. *In situ* analysis of male meiosis  
786 in *C. elegans*. *Methods Cell Biol.* 152:in press.
- 787 Fabritius, A.S., M.L. Ellefson, and F.J. McNally. 2011. Nuclear and spindle positioning during oocyte  
788 meiosis. *Curr Opin Cell Biol.* 23:78-84.
- 789 Farhadifar, R., C.F. Baer, A.C. Valfort, E.C. Andersen, T. Muller-Reichert, M. Delattre, and D.J.  
790 Needleman. 2015. Scaling, Selection, and Evolutionary Dynamics of the Mitotic Spindle. *Current*  
791 *biology : CB.* 25:732-740.
- 792 Garcia-Mengual, E., J.C. Trivino, A. Saez-Cuevas, J. Bataller, M. Ruiz-Jorro, and X. Vendrell. 2019.  
793 Male infertility: establishing sperm aneuploidy thresholds in the laboratory. *J Assist Reprod*  
794 *Genet.* 36:371-381.
- 795 Ghongane, P., M. Kapanidou, A. Asghar, S. Elowe, and V.M. Bolanos-Garcia. 2014. The dynamic protein  
796 Knl1 - a kinetochore rendezvous. *J Cell Sci.* 127:3415-3423.
- 797 Grill, S.W., J. Howard, E. Schaffer, E.H. Stelzer, and A.A. Hyman. 2003. The distribution of active force  
798 generators controls mitotic spindle position. *Science.* 301:518-521.
- 799 Han, X., K. Adames, E.M. Sykes, and M. Srayko. 2015. The KLP-7 Residue S546 Is a Putative Aurora  
800 Kinase Site Required for Microtubule Regulation at the Centrosome in *C. elegans*. *PLoS one.*  
801 10:e0132593.
- 802 Hannak, E., M. Kirkham, A.A. Hyman, and K. Oegema. 2001. Aurora-A kinase is required for  
803 centrosome maturation in *Caenorhabditis elegans*. *J Cell Biol.* 155:1109-1116.
- 804 Hassold, T., and P. Hunt. 2001. To err (meiotically) is human: the genesis of human aneuploidy. *Nat Rev*  
805 *Genet.* 2:280-291.
- 806 Hauf, S., and Y. Watanabe. 2004. Kinetochore orientation in mitosis and meiosis. *Cell.* 119:317-327.
- 807 Hodgkin, J.A., and S. Brenner. 1977. Mutations causing transformation of sexual phenotype in the  
808 nematode *Caenorhabditis elegans*. *Genetics.* 86:275-287.
- 809 Howe, M., K.L. McDonald, D.G. Albertson, and B.J. Meyer. 2001. HIM-10 is required for kinetochore  
810 structure and function on *Caenorhabditis elegans* holocentric chromosomes. *J Cell Biol.*  
811 153:1227-1238.
- 812 Ioannou, D., and H.G. Tempest. 2015. Meiotic Nondisjunction: Insights into the Origin and Significance  
813 of Aneuploidy in Human Spermatozoa. *Advances in experimental medicine and biology.* 868:1-  
814 21.
- 815 Kim, E., L. Sun, C.V. Gabel, and C. Fang-Yen. 2013. Long-term imaging of *Caenorhabditis elegans*  
816 using nanoparticle-mediated immobilization. *PLoS one.* 8:e53419.
- 817 Kline, S.L., I.M. Cheeseman, T. Hori, T. Fukagawa, and A. Desai. 2006. The human Mis12 complex is  
818 required for kinetochore assembly and proper chromosome segregation. *J Cell Biol.* 173:9-17.
- 819 Kremer, J.R., D.N. Mastronarde, and J.R. McIntosh. 1996. Computer visualization of three-dimensional  
820 image data using IMOD. *J Struct Biol.* 116:71-76.
- 821 Kudalkar, E.M., E.A. Scarborough, N.T. Umbreit, A. Zelter, D.R. Gestaut, M. Riffle, R.S. Johnson, M.J.  
822 MacCoss, C.L. Asbury, and T.N. Davis. 2015. Regulation of outer kinetochore Ndc80 complex-  
823 based microtubule attachments by the central kinetochore Mis12/MIND complex. *Proceedings of*  
824 *the National Academy of Sciences of the United States of America.* 112:E5583-5589.
- 825 L'Hernault, S.W. 2006. Spermatogenesis. *WormBook:*1-14.
- 826 Laband, K., R. Le Borgne, F. Edwards, M. Stefanutti, J.C. Canman, J.M. Verbavatz, and J. Dumont. 2017.  
827 Chromosome segregation occurs by microtubule pushing in oocytes. *Nat Commun.* 8:1499.
- 828 LaFountain, J.R., Jr., C.S. Cohan, and R. Oldenbourg. 2011. Functional states of kinetochores revealed by  
829 laser microsurgery and fluorescent speckle microscopy. *Mol Biol Cell.* 22:4801-4808.
- 830 LaFountain, J.R., Jr., C.S. Cohan, and R. Oldenbourg. 2012. Pac-man motility of kinetochores unleashed  
831 by laser microsurgery. *Mol Biol Cell.* 23:3133-3142.
- 832 Levine, H., N. Jorgensen, A. Martino-Andrade, J. Mendiola, D. Weksler-Derri, I. Mindlis, R. Pinotti, and  
833 S.H. Swan. 2017. Temporal trends in sperm count: a systematic review and meta-regression  
834 analysis. *Hum Reprod Update.* 23:646-659.
- 835 Levine, H., H. Mohri, A. Ekbom, L. Ramos, G. Parker, E. Roldan, L. Jovine, S. Koelle, A. Lindstrand, S.  
836 Immler, S. Mortimer, D. Mortimer, G. van der Horst, S. Ishijima, N. Aneck-Hahn, E. Baldi, R.

- 837 Menkveld, S.A. Rothmann, A. Giwercman, Y. Giwercman, M. Holmberg, U. Kvist, L. Bjorndahl,  
838 R. Holmberg, S. Arver, J. Flanagan, and J.R. Drevet. 2018. Male reproductive health statement  
839 (XIIIth international symposium on Spermatology, may 9th-12th 2018, Stockholm, Sweden. *Basic*  
840 *Clin Androl.* 28:13.
- 841 Lindow, N., S. Redemann, F. Brüning, G. Fabig, T. Müller-Reichert, and S. Prohaska. 2018.  
842 Quantification of three-dimensional spindle architecture. *Methods Cell Biol.* 145:45-64.
- 843 Ly, P., S.F. Brunner, O. Shoshani, D.H. Kim, W. Lan, T. Pyntikova, A.M. Flanagan, S. Behjati, D.C.  
844 Page, P.J. Campbell, and D.W. Cleveland. 2019. Chromosome segregation errors generate a  
845 diverse spectrum of simple and complex genomic rearrangements. *Nat Genet.* 51:705-715.
- 846 Maddox, P.S., K.D. Corbett, and A. Desai. 2012. Structure, assembly and reading of centromeric  
847 chromatin. *Curr Opin Genet Dev.* 22:139-147.
- 848 Madl, J.E., and R.K. Herman. 1979. Polyploids and sex determination in *Caenorhabditis elegans*.  
849 *Genetics.* 93:393-402.
- 850 Magescas, J., J.C. Zonka, and J.L. Feldman. 2019. A two-step mechanism for the inactivation of  
851 microtubule organizing center function at the centrosome. *Elife.* 8.
- 852 Mastronarde, D.N. 1997. Dual-axis tomography: an approach with alignment methods that preserve  
853 resolution. *J Struct Biol.* 120:343-352.
- 854 McIntosh, J.R. 2017. Mechanisms of Mitotic Chromosome Segregation. MDPI AG, Basel, Switzerland.
- 855 McIntosh, J.R., M.I. Molodtsov, and F.I. Ataullakhanov. 2012. Biophysics of mitosis. *Q Rev Biophys.*  
856 45:147-207.
- 857 McNally, K.P., M.T. Panzica, T. Kim, D.B. Cortes, and F.J. McNally. 2016. A novel chromosome  
858 segregation mechanism during female meiosis. *Mol Biol Cell.* 27:2576-2589.
- 859 Monen, J., P.S. Maddox, F. Hyndman, K. Oegema, and A. Desai. 2005. Differential role of CENP-A in  
860 the segregation of holocentric *C. elegans* chromosomes during meiosis and mitosis. *Nat Cell Biol.*  
861 7:1248-1255.
- 862 Moore, L.L., and M.B. Roth. 2001. HCP-4, a CENP-C-like protein in *Caenorhabditis elegans*, is required  
863 for resolution of sister centromeres. *J Cell Biol.* 153:1199-1208.
- 864 Moore, L.L., G. Stanvitch, M.B. Roth, and D. Rosen. 2005. HCP-4/CENP-C promotes the prophase  
865 timing of centromere resolution by enabling the centromere association of HCP-6 in  
866 *Caenorhabditis elegans*. *Mol Cell Biol.* 25:2583-2592.
- 867 Muller-Reichert, T., G. Greenan, E. O'Toole, and M. Srayko. 2010. The *elegans* of spindle assembly. *Cell*  
868 *Mol Life Sci.* 67:2195-2213.
- 869 Muller-Reichert, T., H. Hohenberg, E.T. O'Toole, and K. McDonald. 2003. Cryoimmobilization and three-  
870 dimensional visualization of *C. elegans* ultrastructure. *J Microsc.* 212:71-80.
- 871 Muller-Reichert, T., J. Mantler, M. Srayko, and E. O'Toole. 2008. Electron microscopy of the early  
872 *Caenorhabditis elegans* embryo. *J Microsc.* 230:297-307.
- 873 Muscat, C.C., K.M. Torre-Santiago, M.V. Tran, J.A. Powers, and S.M. Wignall. 2015. Kinetochore-  
874 independent chromosome segregation driven by lateral microtubule bundles. *Elife.* 4:e06462.
- 875 Nahaboo, W., M. Zouak, P. Askjaer, and M. Delattre. 2015. Chromatids segregate without centrosomes  
876 during *Caenorhabditis elegans* mitosis in a Ran- and CLASP-dependent manner. *Mol Biol Cell.*  
877 26:2020-2029.
- 878 Nicklas, R.B., and D.F. Kubai. 1985. Microtubules, chromosome movement, and reorientation after  
879 chromosomes are detached from the spindle by micromanipulation. *Chromosoma.* 92:313-324.
- 880 Nicklas, R.B., J.C. Waters, E.D. Salmon, and S.C. Ward. 2001. Checkpoint signals in grasshopper meiosis  
881 are sensitive to microtubule attachment, but tension is still essential. *J Cell Sci.* 114:4173-4183.
- 882 O'Donnell, L., and M.K. O'Bryan. 2014. Microtubules and spermatogenesis. *Semin Cell Dev Biol.* 30:45-  
883 54.
- 884 O'Toole, E.T., K.L. McDonald, J. Mantler, J.R. McIntosh, A.A. Hyman, and T. Muller-Reichert. 2003.  
885 Morphologically distinct microtubule ends in the mitotic centrosome of *Caenorhabditis elegans*. *J*  
886 *Cell Biol.* 163:451-456.
- 887 Oegema, K., A. Desai, S. Rybina, M. Kirkham, and A.A. Hyman. 2001. Functional analysis of  
888 kinetochore assembly in *Caenorhabditis elegans*. *J Cell Biol.* 153:1209-1226.

- 889 Peters, N., D.E. Perez, M.H. Song, Y. Liu, T. Muller-Reichert, C. Caron, K.J. Kemphues, and K.F.  
890 O'Connell. 2010. Control of mitotic and meiotic centriole duplication by the Plk4-related kinase  
891 ZYG-1. *J Cell Sci.* 123:795-805.
- 892 Petronczki, M., M.F. Siomos, and K. Nasmyth. 2003. Un menage a quatre: the molecular biology of  
893 chromosome segregation in meiosis. *Cell.* 112:423-440.
- 894 Petrovic, A., J. Keller, Y. Liu, K. Overlack, J. John, Y.N. Dimitrova, S. Jenni, S. van Gerwen, P. Stege, S.  
895 Wohlgenuth, P. Rombaut, F. Herzog, S.C. Harrison, I.R. Vetter, and A. Musacchio. 2016.  
896 Structure of the MIS12 Complex and Molecular Basis of Its Interaction with CENP-C at Human  
897 Kinetochores. *Cell.* 167:1028-1040 e1015.
- 898 Petrovic, A., S. Pasqualato, P. Dube, V. Krenn, S. Santaguida, D. Cittaro, S. Monzani, L. Massimiliano, J.  
899 Keller, A. Tarricone, A. Maiolica, H. Stark, and A. Musacchio. 2010. The MIS12 complex is a  
900 protein interaction hub for outer kinetochore assembly. *J Cell Biol.* 190:835-852.
- 901 Phillips, C.M., and A.F. Dernburg. 2006. A family of zinc-finger proteins is required for chromosome-  
902 specific pairing and synapsis during meiosis in *C. elegans*. *Dev Cell.* 11:817-829.
- 903 Phillips, C.M., C. Wong, N. Bhalla, P.M. Carlton, P. Weiser, P.M. Meneely, and A.F. Dernburg. 2005.  
904 HIM-8 binds to the X chromosome pairing center and mediates chromosome-specific meiotic  
905 synapsis. *Cell.* 123:1051-1063.
- 906 Pintard, L., and B. Bowerman. 2019. Mitotic Cell Division in *Caenorhabditis elegans*. *Genetics.* 211:35-  
907 73.
- 908 Reck-Peterson, S.L., W.B. Redwine, R.D. Vale, and A.P. Carter. 2018. The cytoplasmic dynein transport  
909 machinery and its many cargoes. *Nat Rev Mol Cell Biol.* 19:382-398.
- 910 Redemann, S., J. Baumgart, N. Lindow, M. Shelley, E. Nazockdast, A. Kratz, S. Prohaska, J. Bruges, S.  
911 Furthauer, and T. Muller-Reichert. 2017. *C. elegans* chromosomes connect to centrosomes by  
912 anchoring into the spindle network. *Nat Commun.* 8:15288.
- 913 Redemann, S., I. Lantsch, N. Lindow, S. Prohaska, M. Srayko, and T. Muller-Reichert. 2018. A Switch  
914 in Microtubule Orientation during *C. elegans* Meiosis. *Current biology : CB.* 28:2991-2997.
- 915 Redemann, S., B. Weber, M. Moller, J.M. Verbavatz, A.A. Hyman, D. Baum, S. Prohaska, and T. Muller-  
916 Reichert. 2014. The segmentation of microtubules in electron tomograms using Amira. *Methods*  
917 *Mol Biol.* 1136:261-278.
- 918 Ris, H. 1949. The anaphase movement of chromosomes in the spermatocytes of the grasshopper. *Biol*  
919 *Bull.* 96:90-106.
- 920 Schindelin, J., I. Arganda-Carreras, E. Frise, V. Kaynig, M. Longair, T. Pietzsch, S. Preibisch, C. Rueden,  
921 S. Saalfeld, B. Schmid, J.Y. Tinevez, D.J. White, V. Hartenstein, K. Eliceiri, P. Tomancak, and A.  
922 Cardona. 2012. Fiji: an open-source platform for biological-image analysis. *Nat Methods.* 9:676-  
923 682.
- 924 Schmidt, D.J., D.J. Rose, W.M. Saxton, and S. Strome. 2005. Functional analysis of cytoplasmic dynein  
925 heavy chain in *Caenorhabditis elegans* with fast-acting temperature-sensitive mutations. *Mol Biol*  
926 *Cell.* 16:1200-1212.
- 927 Schmidt, R., L.E. Fielmich, I. Grigoriev, E.A. Katrukha, A. Akhmanova, and S. van den Heuvel. 2017.  
928 Two populations of cytoplasmic dynein contribute to spindle positioning in *C. elegans* embryos. *J*  
929 *Cell Biol.* 216:2777-2793.
- 930 Scholey, J.M., G. Civelekoglu-Scholey, and I. Brust-Mascher. 2016. Anaphase B. *Biology (Basel).* 5.
- 931 Schvarzstein, M., D. Pattabiraman, J.N. Bembenek, and A.M. Villeneuve. 2013. Meiotic HORMA domain  
932 proteins prevent untimely centriole disengagement during *Caenorhabditis elegans* spermatocyte  
933 meiosis. *Proceedings of the National Academy of Sciences of the United States of America.*  
934 110:E898-907.
- 935 Sengupta, P., E. Borges, Jr., S. Dutta, and E. Krajewska-Kulak. 2018. Decline in sperm count in European  
936 men during the past 50 years. *Hum Exp Toxicol.* 37:247-255.
- 937 Severson, A.F., and B.J. Meyer. 2014. Divergent kleisin subunits of cohesin specify mechanisms to tether  
938 and release meiotic chromosomes. *Elife.* 3:e03467.
- 939 Severson, A.F., G. von Dassow, and B. Bowerman. 2016. Oocyte Meiotic Spindle Assembly and  
940 Function. *Curr Top Dev Biol.* 116:65-98.

- 941 Shakes, D.C., B.J. Neva, H. Huynh, J. Chaudhuri, and A. Pires-Dasilva. 2011. Asymmetric spermatocyte  
942 division as a mechanism for controlling sex ratios. *Nat Commun.* 2:157.
- 943 Shakes, D.C., J.C. Wu, P.L. Sadler, K. Laprade, L.L. Moore, A. Noritake, and D.S. Chu. 2009.  
944 Spermatogenesis-specific features of the meiotic program in *Caenorhabditis elegans*. *PLoS*  
945 *genetics.* 5:e1000611.
- 946 Skibbens, R.V., V.P. Skeen, and E.D. Salmon. 1993. Directional instability of kinetochore motility during  
947 chromosome congression and segregation in mitotic newt lung cells: a push-pull mechanism. *J*  
948 *Cell Biol.* 122:859-875.
- 949 Skop, A.R., D. Bergmann, W.A. Mohler, and J.G. White. 2001. Completion of cytokinesis in *C. elegans*  
950 requires a brefeldin A-sensitive membrane accumulation at the cleavage furrow apex. *Current*  
951 *biology : CB.* 11:735-746.
- 952 Soppina, V., A.K. Rai, A.J. Ramaiya, P. Barak, and R. Mallik. 2009. Tug-of-war between dissimilar teams  
953 of microtubule motors regulates transport and fission of endosomes. *Proceedings of the National*  
954 *Academy of Sciences of the United States of America.* 106:19381-19386.
- 955 Srayko, M., T. O'Toole E, A.A. Hyman, and T. Muller-Reichert. 2006. Katanin disrupts the microtubule  
956 lattice and increases polymer number in *C. elegans* meiosis. *Current biology : CB.* 16:1944-1949.
- 957 Stalling, D., M. Westerhoff, and H.-C. Hege. 2005. Amira: a highly interactive system for visual data  
958 analysis. In *The Visualization Handbook*. C.D. Hansen and C.R. Johnson, editors. Elsevier. 749–  
959 767.
- 960 Strome, S., J. Powers, M. Dunn, K. Reese, C.J. Malone, J. White, G. Seydoux, and W. Saxton. 2001.  
961 Spindle dynamics and the role of gamma-tubulin in early *Caenorhabditis elegans* embryos. *Mol*  
962 *Biol Cell.* 12:1751-1764.
- 963 Sulston, J., and J. Hodgkin. 1988. Methods. In *The nematode C. elegans*. B.W. Wood, editor. Cold Spring  
964 Harbor Laboratory Press, Cold Spring Harbor, New York. 587-606.
- 965 Sutradhar, S., and R. Paul. 2014. Tug-of-war between opposing molecular motors explains chromosomal  
966 oscillation during mitosis. *J Theor Biol.* 344:56-69.
- 967 Weber, B., G. Greenan, S. Prohaska, D. Baum, H.-C. Hege, T. Müller-Reichert, A.A. Hyman, and J.-M.  
968 Verbavatz. 2012. Automated tracing of microtubules in electron tomograms of plastic embedded  
969 samples of *C. elegans* embryos. *J Struct Biol.* 178:129-138.
- 970 Weber, B., E.M. Tranfield, J.L. Hoog, D. Baum, C. Antony, T. Hyman, J.M. Verbavatz, and S. Prohaska.  
971 2014. Automated stitching of microtubule centerlines across serial electron tomograms. *PloS one.*  
972 9:e113222.
- 973 Wei, R.R., J. Al-Bassam, and S.C. Harrison. 2007. The Ndc80/HEC1 complex is a contact point for  
974 kinetochore-microtubule attachment. *Nat Struct Mol Biol.* 14:54-59.
- 975 Wilson-Kubalek, E.M., I.M. Cheeseman, and R.A. Milligan. 2016. Structural comparison of the  
976 *Caenorhabditis elegans* and human Ndc80 complexes bound to microtubules reveals distinct  
977 binding behavior. *Mol Biol Cell.* 27:1197-1203.
- 978 Winter, E.S., A. Schwarz, G. Fabig, J.L. Feldman, A. Pires-daSilva, T. Muller-Reichert, P.L. Sadler, and  
979 D.C. Shakes. 2017. Cytoskeletal variations in an asymmetric cell division support diversity in  
980 nematode sperm size and sex ratios. *Development.* 144:3253-3263.
- 981 Yu, C.-H., S. Redemann, H.-Y. Wu, R. Kiewisz, T.Y. Yoo, R. Farhadifar, T. Müller-Reichert, and D.  
982 Needleman. 2019. Central spindle microtubules are strongly coupled to chromosomes during both  
983 anaphase A and anaphase B. *Mol Biol Cell.* doi: 10.1091/mbc.E19-01-0074.
- 984 Zhang, D., and R.B. Nicklas. 1995. Chromosomes initiate spindle assembly upon experimental dissolution  
985 of the nuclear envelope in grasshopper spermatocytes. *J Cell Biol.* 131:1125-1131.

986

987

## 988 **Figures**

### 989 **Figure 1. Spindle and X chromosome dynamics during meiotic divisions in males.**

990 Time series of confocal image projections of **(A)** meiosis I (M I) and **(B)** meiosis II (M II).  
991 Microtubules ( $\beta$ -tubulin::GFP, green) and chromosomes (histone H2B::mCherry, red) are  
992 visualized. Anaphase onset is time point zero ( $t=0$ ). The progression of chromosome  
993 segregation is visualized in kymographs (right panels; anaphase onset is indicated by an orange  
994 line). The position of the unpaired X chromosome in meiosis I is marked by white arrowheads.  
995 Scale bar (white), 2  $\mu$ m; time bar (blue), 2 min.

996

### 997 **Figure 2. Unpaired chromosomes lag in male spermatocyte meiosis I.**

998 Confocal image projections of spermatocyte meiosis I in **(A)** wild-type XO males, **(B)** wild-type  
999 XX hermaphrodites, **(C)** *tra-2(e1094)* XX males, **(D)** *him-8(e1489)* XX hermaphrodites, **(E)** in  
1000 *zim-2(tm574)* XX hermaphrodites, **(F)** *zim-2(tm574)* XO males, **(G)** in triploid XXO males.  
1001 Centrosomes are labeled in green ( $\gamma$ -tubulin::GFP) and chromosomes in red (histone  
1002 H2B::mCherry). The genotype, sex, number of autosome pairs, occurrence of paired X  
1003 chromosomes and number of unpaired chromosomes is indicated. Still images illustrate the  
1004 progression of the first meiotic division over time. Arrowheads (white) indicate lagging  
1005 chromosomes. In the corresponding kymographs (right panels), chromosomes are shown in  
1006 gray, spindle poles in green. Anaphase onset is marked (dashed line, orange). Scale bars  
1007 (white), 2  $\mu$ m; time bars (blue), 2 min.

1008

### 1009 **Figure 3. Spermatocyte meiotic spindles display both anaphase A and B movement.**

1010 **(A)** Schematic representation of metaphase and anaphase during meiosis. Centrosomes are  
1011 illustrated in green, autosomes in blue and the univalent X chromosome in red. The pole-to-pole  
1012 (P-P, green), autosome-to-autosome (A-A, red), and both pole-to-autosome distances (P-A,  
1013 orange) are indicated. **(B)** Time series of projections of a spindle in meiosis I obtained by

1014 confocal light microscopy. Centrosomes are labeled with  $\gamma$ -tubulin::GFP (green) and  
1015 chromosomes with histone H2B::mCherry (red). The separation of the centrosomes (yellow  
1016 dashed line) and autosomes (white dashed line) over time is indicated. Anaphase onset is time  
1017 point zero ( $t=0$ ). Scale bar, 2  $\mu$ m. (C) Schematic representation of metaphase and anaphase  
1018 during meiosis II as shown in (A). (D) Separation of centrosomes and autosomes in meiosis II as  
1019 shown in (C). Scale bar, 2  $\mu$ m. (E) Quantitative analysis of autosome and centrosome dynamics  
1020 in meiosis I. Anaphase onset is time point zero ( $t=0$ ). (F) Quantitative analysis of autosome and  
1021 centrosome dynamics in meiosis II. The mean and standard deviation is given (circles and  
1022 shaded areas) for (E) and (F).

1023

1024 **Figure 4. Kinetochores do not disassemble between spermatocyte meiotic divisions.**

1025 (A) Schematic representation of kinetochore (KT) organization in *C. elegans*. (B) Localization  
1026 patterns of kinetochore proteins on single bivalents (schematic illustration, left panel; summary  
1027 of immunostainings as shown in (C), right panel). Kinetochore proteins with a similar pattern of  
1028 localization in sperm and oocytes are listed in black, proteins with a gamete-specific pattern in  
1029 red. (C) Visualization of kinetochore proteins in sperm (upper two panels) and oocyte meiosis I  
1030 (lower two panels). Metaphase (upper row in each panel) and anaphase (lower row in each  
1031 panel) of the first division is given. Males were fixed and stained with antibodies against  
1032 kinetochore proteins (green), microtubules (red), and DAPI (blue) and imaged by confocal light  
1033 microscopy. For each kinetochore protein, the left panels show whole spindles with  
1034 microtubules, chromosomes and kinetochores; right panels show the localization patterns of the  
1035 kinetochore protein only. Scale bars, 2  $\mu$ m.

1036

1037 **Figure 5. Microtubules attached to the X chromosome exert a pulling force.**

1038 (A) Maximum intensity projection images with chromosomes labeled with histone H2B::mCherry  
1039 (upper panel, shown in white). Time is relative to the onset of segregation of the X chromosome

1040 (t=0). Scale bar, 2  $\mu\text{m}$ . Illustration of X chromosome shape quantitation (lower panel). The length  
1041 (Z) of the X chromosome (red) is divided by its width (mean of X + Y). Autosomes are shown in  
1042 blue. Time is relative to the onset of segregation of the X chromosome (t=0). **(B)** Plot showing  
1043 the shape of chromosomes in male spindles (n=15). The upper panel shows the autosome 1-to-  
1044 autosome 2 (A-A, blue) and the autosome 1-to-X chromosome distances (A-X, red) over time,  
1045 the lower panel the shape coefficient (black). Solid lines show the mean, shaded areas indicate  
1046 the standard deviation. Time zero (t=0) is the onset of X chromosome movement. **(C)**  
1047 Microsurgery of microtubules associated with the X chromosome in anaphase I. Microtubules  
1048 are labeled with  $\beta$ -tubulin::GFP (green) and chromosomes with histone H2B::mCherry (red).  
1049 Time is given relative to the time point of the applied laser cut (t=0). The position of the cut is  
1050 indicated (white circle). The position of the autosomes (outer dashed lines) and the X  
1051 chromosome (inner dashed line) is indicated. The three panels show examples with a fast (top),  
1052 intermediate (middle) and slow response (bottom) of X chromosome segregation to the applied  
1053 cut. Scale bars, 2  $\mu\text{m}$ . **(D)** Example of a double cut experiment. The panels show a single  
1054 experiment over about 300 s. The two cuts are indicated (white circles). Scale bar, 2  $\mu\text{m}$ .

1055  
1056 **Figure 6. Three-dimensional ultrastructure of spindles in spermatocyte meiosis I.**  
1057 Full tomographic reconstruction of spermatocyte spindles. Scale bars, 500 nm. **(A)** Metaphase  
1058 spindle. **(B)** Spindle at anaphase onset. **(C)** Spindle at mid anaphase with a pole-to-pole  
1059 distance of 2.98  $\mu\text{m}$ . **(D)** Mid anaphase spindle with a pole-to-pole distance of 3.35  $\mu\text{m}$ . **(E)** Mid  
1060 anaphase spindle with a pole-to-pole distance of 3.37  $\mu\text{m}$ . **(F)** Spindle at late anaphase with a  
1061 pole-to-pole distance of 5.45  $\mu\text{m}$  and the X chromosome with initial segregation to one of the  
1062 daughter cells. Left panels: tomographic slice showing the centrosomes (colored purple, c), the  
1063 autosomes (a), and the unpaired X chromosome (x) aligned along the spindle axis. Mitochondria  
1064 (m) and fibrous body-membranous organelles (fb) are also indicated. Mid left panels:  
1065 corresponding three-dimensional model illustrating the organization of the full spindle.

1066 Autosomes are shown in different shades of either blue or cyan, the X chromosome in red,  
1067 centriolar microtubules in purple, microtubules within 150 nm to the chromosome surfaces in  
1068 yellow, and all other microtubules in gray. Mid right panels: interaction of microtubules with the  
1069 kinetochores. Kinetochores are shown as semi-transparent regions around each chromosome.  
1070 The part of each microtubule entering the kinetochore region around the holocentric  
1071 chromosomes is shown in green. Right panels: visualization of end-on (white) *versus* lateral  
1072 (orange) interactions of microtubules with chromosomes. Only the parts of microtubules inside of  
1073 the kinetochore region are shown.

1074  
1075 **Figure 7. X chromosome-attached microtubules are continuous and lengthen during**  
1076 **anaphase I.**

1077 **(A)** Length distribution of end-on X chromosome-attached microtubules at different stages of  
1078 meiosis I (corresponding to data sets as shown in Fig. 6). Dots show the mean, error bars  
1079 indicate the standard deviation. **(B)** Length distribution of laterally X chromosome-attached  
1080 microtubules at different stages of meiosis I. **(C)** Schematic drawing illustrating X chromosome-  
1081 attached kinetochore microtubules. Both end-on (yellow) and laterally attached microtubules  
1082 (purple) are shown (left panels). Curvature of individual microtubules is measured as illustrated  
1083 (right panel) using tortuosity, which is spline length (red dotted lines) divided by end-to-end  
1084 length (black dotted lines). **(D)** Plot showing the tortuosity of end-on and laterally attached  
1085 kinetochore microtubules. The meiotic stages correspond to the data sets as shown in Figure 6.  
1086 The mean, standard deviation and individual measurements are given for each data set.

1087  
1088 **Figure 8. Resolution of the X chromosome to one side correlates with an asymmetry of**  
1089 **microtubules.**

1090 **(A)** Left: EM model of an anaphase I spindle and definition of two identical volumes at opposite  
1091 positions to the X chromosome. Right: Extraction of microtubules and measurement of the total



1092 polymer length within the selected volumes. The total length of microtubules was measured  
1093 within volumes of  $1 \mu\text{m}^3$ . **(B)** Graph showing the ratio of both volumetric polymer length  
1094 measurements plotted against the autosome-autosome distance for each individual data set  
1095 corresponding to the stages shown in Fig. 6 and Fig. S5. A trend line was fitted to illustrate the  
1096 increase in the asymmetry. **(C)** Deconstructed 3D model (anaphase 2 data set) illustrating the  
1097 total number of microtubules attached on each side of the X chromosome (red), named pos. 1  
1098 (microtubules shown in green) and pos. 2 (microtubules shown in blue). Centrioles are shown in  
1099 purple, undefined microtubules in yellow. **(D)** Table showing the autosome 1-to-autosome 2  
1100 distance (A1-A2), the total number of microtubules for both positions and the calculated ratio for  
1101 each data set. **(E)** Upper panel: Maximum intensity projection images from live imaging show  
1102 microtubules attachments to the segregating X chromosome. Microtubules are labeled with  $\beta$ -  
1103 tubulin::GFP (white) and chromosomes with histone H2B::mCherry (red). Time is given relative  
1104 to the onset of X chromosome segregation ( $t=0$ ). Scale bar,  $2 \mu\text{m}$ . Lower panel: Illustration of the  
1105 measurement of fluorescence intensity in two volumes ( $V_1$ ,  $V_2$ ) of  $1 \mu\text{m}^3$  each at opposite sides  
1106 of the X chromosome (red), autosomes (blue), microtubules (green). **(F)** Ratio of fluorescence  
1107 intensities ( $V_1/V_2$ ) as illustrated in (A). Upper panel: the autosomes 1-to-autosomes 2 distance  
1108 (A-A, red) and the autosomes 1-to-X chromosome distance (A-X, blue) over time. Solid lines  
1109 show the mean, shaded areas indicate the standard deviation. Time zero ( $t=0$ ) corresponds to  
1110 the onset of X chromosome movement. Lower panel: the ratio of fluorescence intensities is  
1111 given for corresponding time points (black, time is relative to the onset of segregation of the X  
1112 chromosome,  $t=0$ ;  $n=5$ ).

1113  
1114 **Figure 9. Autosome-attached kinetochore microtubules do not shorten during anaphase.**  
1115 **(A)** Length distribution of end-on autosome-attached microtubules at different stages of meiosis I  
1116 (corresponding to data sets as shown in Fig. 6). Dots show the mean, error bars indicate the

1117 standard deviation. **(B)** Length distribution of laterally autosome-attached microtubules at  
1118 different stages of meiosis I.

1119

1120 Figure 10. **Changes in the geometry of spindles account for anaphase A pole-**  
1121 **chromosome shortening.**

1122 **(A)** Analysis of autosome stretch. Schematic representations of anaphase I showing the  
1123 determination of stretch along the pole-to-pole spindle axis for an individual autosome (left  
1124 panels). Stretch is indicated by the full width half maximum (FWHM), which was quantified as  
1125 shown in the right panels. **(B)** Plot showing the FWHM of chromosome stretch for each meiotic  
1126 stage analyzed. The mean, standard deviation and single measurements ( $n = 10$ ) for each  
1127 meiotic stage (corresponding to the ones as shown in Fig. 6) are given. One-way analysis of  
1128 variance (ANOVA) of the metaphase dataset against anaphase datasets no. 3 and 4 are shown.

1129 Level of significance: \*\* represents  $p \leq 0.01$ . **(C)** Analysis of the distance of individual  
1130 kinetochore microtubule plus ends to the closest centriole (left panels: schematic drawings). For  
1131 each kinetochore microtubule (green line), the direct distance (yellow line) from the putative plus  
1132 end to the respective centriole was measured (right panels; plus ends of kinetochore  
1133 microtubules are circles). **(D)** Plot showing the distance of kinetochore microtubule plus-ends to

1134 centrioles at different meiotic stages as described in (B). The mean, standard deviation and  
1135 single measurements for each meiotic stage are given. One-way ANOVA of the metaphase  
1136 dataset against anaphase datasets no. 3 and 4 are shown. Levels of significance: \* is  $p \leq 0.05$ ;  
1137 and \*\*\* is  $p \leq 0.001$ . Additional ANOVA results are in Fig. S8H. **(E)** Analysis of the attachment

1138 angle of kinetochore microtubules associated end-on to autosomes. The schematic illustrates  
1139 the defined main axis for the measurements (left panel: dashed line from the center of each  
1140 autosome to the center of the centrosome,). Right panel: the angle ( $\square$ ) between each line  
1141 connecting the kinetochore microtubule plus-end and the autosome center (green lines) and the  
1142 main axis (dashed line) was measured for each kinetochore microtubule. **(F)** Plot showing the

1143 angle measurements from (E). The mean, standard deviation and single measurements for each  
1144 meiotic stage are given. One-way ANOVA of the metaphase dataset against anaphase datasets  
1145 no. 3 and 4 are shown. Levels of significance: \*\*\* is  $p \leq 0.001$ . Additional ANOVA results are in  
1146 Fig. S8I.

1147

1148 **Figure 11. Proposed models of chromosome movements in meiosis I.**

1149 **(A)** Model illustrating the anaphase movement of autosomes in sperm meiosis in the absence of  
1150 kinetochore microtubule shortening. Left upper panel is metaphase; right upper panel is  
1151 anaphase; lower panel shows combining anaphase A and B. Chromosomes are shown in blue,  
1152 centrosomes in green, centrioles in black. Laterally associated microtubules are illustrated in  
1153 orange. The end-on attached kinetochore microtubules (magenta in metaphase and green in  
1154 anaphase) have the same length at both stages. The lower panel is an overlay of metaphase  
1155 (magenta) with anaphase A (green, anaphase B movement was not considered) to show the  
1156 relative movement of the autosomes with respect to the centrosomes. A rounding of the  
1157 autosomes, a shrinking of the volume of the centrosomes and a change in the attachment angle  
1158 of the microtubules is illustrated. **(B)** Tug-of-war model for the initiation of X chromosome  
1159 segregation in anaphase I. The X chromosome (red), the holocentric kinetochore (gray), X  
1160 chromosome-attached kinetochore microtubules (green). Left panel: At metaphase, pulling  
1161 forces at the X chromosome are in balance. Right panel: segregation of the X chromosome is  
1162 initiated by an imbalance of forces, obvious by an unequal number of kinetochore microtubules  
1163 attached to the opposite sides of the X chromosome. X will move to the side with more attached  
1164 kinetochore microtubules.

1165

1166

## 1167 **Supplementary Figures**

### 1168 **Figure S1. Analysis of centrosomal volumes in meiosis I and II.**

1169 **(A)** Plot showing centrosome volume in meiosis I over time. The 3D volume was measured in  
1170 worms expressing  $\gamma$ -tubulin::GFP and histone H2B::mCherry. For each dataset a fixed threshold  
1171 was defined to segment the outer border of the centrosome. The mean volume is plotted as a  
1172 green line for unsplitted centrosomes and shown as an orange to red line for splitted  
1173 centrosomes. The percentage of splitted centrosomes is indicated by this color change. For  
1174 splitted centrosomes, the sum of both separated centrosomes was determined (n=44). The  
1175 standard deviation is depicted as a shaded area. **(B)** Centrosome volume over time (purple line)  
1176 in meiosis II (n=64).

1177

### 1178 **Figure S2. Spindle organization in early embryos and oocytes of *C. elegans*.**

1179 **(A)** First mitosis in the early embryo. Microtubules ( $\beta$ -tubulin::GFP, green) and chromosomes  
1180 (histone H2B::mCherry, red) are visualized in time series of confocal image projections (left  
1181 panel). Anaphase onset is time point zero (t=0). The anterior and the posterior centrosome is  
1182 indicated). The progression of chromosome segregation is shown in a kymograph (right panel).  
1183 Anaphase onset is indicated by a dashed line (orange). The histone H2B::mCherry signal in the  
1184 kymograph is shown in gray. Scale bar (white), 2  $\mu$ m; time bar (blue), 2 min. **(B)** Female meiosis  
1185 in hermaphrodites. The two consecutive meiotic divisions show acentrosomal spindles (left  
1186 panels; upper row, meiosis I; lower row, meiosis II). Chromosomes are extruded by two polar  
1187 bodies (PB I and II). Kymographs (right panels) illustrate the reorganization of the microtubules  
1188 (left panels). Scale bar (white), 2  $\mu$ m; time bar (blue), 2 min.

1189

### 1190 **Figure S3. Spindle organization in meiosis I in wild-type and *tra-2* mutants.**

1191 Time series of confocal image projections of meiosis I spindles in **(A)** wild-type and in **(B)** three  
1192 examples of *tra-2*(e1094) mutant males. Microtubules ( $\beta$ -tubulin::GFP) and chromosomes

1193 (histone H2B::mCherry) are visualized in green and red, respectively. Anaphase onset is time  
1194 point zero ( $t=0$ ). Chromosome segregation is also visualized in kymographs (right panel; the  
1195 start of the separation of the autosomes is indicated by an orange line). Scale bars (white), 2  
1196  $\mu\text{m}$ ; time bar (blue), 2 min.

1197  
1198 **Figure S4. The outer kinetochore protein NDC80 localizes between chromosomes and**  
1199 **microtubules at spermatocyte metaphase and anaphase I.**

1200 **(A)** Super-resolution fluorescence microscopy of metaphase I in fixed *him-8* X0 males stained  
1201 with antibodies against  $\alpha$ -tubulin (red) and NCD-80 (green). DAPI stained DNA is in blue. Scale  
1202 bar, 2  $\mu\text{m}$ . **(B-C)** Enlargement of boxed regions as shown in (A) highlighting microtubule and  
1203 NDC-80 localization relative to metaphase chromosomes. Normalized intensity values along the  
1204 arrows for each staining pattern are plotted in the histograms (right panels). Scale bars, 0.5  $\mu\text{m}$ .  
1205 **(D)** Super-resolution fluorescence microscopy of anaphase I in *him-8* X0 males. Imaging  
1206 conditions were as given in (A). Scale bar, 2  $\mu\text{m}$ . **(E-G)** Enlargement of boxed regions as shown  
1207 in (A) highlighting microtubule and NDC-80 localization relative to separating chromosomes.  
1208 Scale bar, 0.5  $\mu\text{m}$ .

1209  
1210 **Figure S5. Visualization of partially reconstructed spindles in mid/late anaphase I.**

1211 **(A)** Tomographic reconstruction of an anaphase I spindle. Left panel: tomographic slice showing  
1212 the autosomes (a), and the univalent X chromosome (x) aligned along the spindle axis.  
1213 Mitochondria (m) and fibrous body-membranous organelles (fb) are also indicated. Mid left  
1214 panel: corresponding three-dimensional model illustrating the organization of the full spindle.  
1215 Autosomes are in blue, the X chromosome in red, microtubules within a distance of 150 nm or  
1216 closer to the chromosome surfaces in yellow and all other microtubules in gray. Mid right panel:  
1217 association of microtubules with the kinetochores. Kinetochores are shown as semi-transparent  
1218 regions around each chromosome. The part of each microtubule entering the kinetochore region

1219 around the holocentric chromosomes is in green. Right panel: visualization of end-on (white)  
1220 *versus* lateral (orange) association of microtubules with chromosomes. Only the part inside of  
1221 the kinetochore is shown. **(B)** Second example of spindle organization at mid anaphase I. **(C)**  
1222 Example of spindle organization at late anaphase I. Scale bars, 500 nm.

1223

1224 **Figure S6. Length distribution of microtubules at different stages of meiosis I.**

1225 **(A)** Analysis of microtubule length in metaphase (corresponding to data sets as shown in Fig. 6).  
1226 Measurements for: end-on X chromosome-attached microtubules (yellow), lateral X  
1227 chromosome-attached microtubules (violet), end-on autosome-attached microtubules (green),  
1228 and lateral autosome-attached microtubules (light blue). The mean and standard deviation are  
1229 shown as white lines in the violin plots. Distributions were compared using a one-way ANOVA  
1230 with three levels of significance: \* is  $p \leq 0.05$ ; \*\* is  $p \leq 0.01$ ; and \*\*\* is  $p \leq 0.001$ . **(B)**  
1231 Microtubule length at anaphase onset. **(C)** Microtubule length at mid anaphase (dataset  
1232 anaphase 1 of Fig. 6). **(D)** Microtubule length at mid anaphase (dataset anaphase 2 of Fig. 6).  
1233 **(E)** Microtubule length at mid anaphase (dataset anaphase 3 of Fig. 6). **(F)** Microtubule length at  
1234 late anaphase (dataset anaphase 4 of Fig. 6).

1235

1236 **Figure S7. Comparison of the EM data sets with the dynamic light microscopic data.**

1237 **(A)** The pole-to-pole distance plotted against the autosome-to-autosome distance for each data  
1238 set (stages and color coding as presented in Fig. 8B). The colored bold “x” symbols illustrate  
1239 where the EM-data sets are positioned with respect to the averaged light microscopy data as  
1240 shown in Fig. 3E (black “x” symbols with fitted black dashed line). **(B)** The pole-to-autosome  
1241 distance plotted against the autosome-to-autosome distance in meiosis I (bold-colored “+”  
1242 symbols show the EM data, black symbols and dashed line illustrate the light microscopic data  
1243 with linear fit).

1244

1245 **Figure S8. Comparison of distributions within EM data measurements.**

1246 **(A)** The length of end-on kinetochore microtubules associated with the X chromosome for each  
1247 meiotic stage corresponding to Fig. 7A. The mean, standard deviation and single measurements  
1248 for each meiotic stage (according to the ones as shown in Figure 6) are given. Results of a one-  
1249 way analysis of variance (ANOVA) of all data sets against each other are shown. Level of  
1250 significance: \* is  $p \leq 0.05$ ; \*\* is  $p \leq 0.01$ ; and \*\*\* is  $p \leq 0.001$ . **(B)** Plot showing the length of  
1251 lateral kinetochore microtubules associated with the X chromosome for each meiotic stage  
1252 corresponding to Fig. 7B. **(C)** The length of end-on kinetochore microtubules associated with the  
1253 autosomes for each meiotic stage corresponding to Fig. 9A. **(D)** The length of lateral s  
1254 associated with the autosomes for each meiotic stage corresponding to Fig. 9B. **(E)** The  
1255 tortuosity of end-on kinetochore microtubules associated with the X chromosome for each  
1256 meiotic stage corresponding to Fig. 7D. **(F)** The tortuosity of lateral kinetochore microtubules  
1257 associated with the X chromosome for each meiotic stage corresponding to Fig. 7D. **(G)** The  
1258 FWHM of the chromosome stretch for each meiotic stage corresponding to Fig. 10B. **(H)** The  
1259 distance of kinetochore microtubule plus-ends at the autosomes to centrioles for each meiotic  
1260 stage corresponding to Fig. 10D. **(I)** The angle measurements as given in Fig. 10E for each  
1261 meiotic stage corresponding to Fig. 10F.

1262

1263 **Supplementary Movies**

1264 **Movie S1. Live-cell imaging of the first and second meiotic division in wild-type males.**

1265 The strain was labeled with  $\beta$ -tubulin::GFP (green) and histone H2B::mCherry (red) to visualize  
1266 microtubules and chromosomes, respectively. Time is given relative to anaphase onset of  
1267 meiosis I. Scale bar, 2  $\mu$ m. This supplementary movie corresponds to Fig. 1A and B.

1268

1269 **Movie S2. Live-cell imaging of the first meiotic division in wild-type males.**

1270 The strain was labeled with  $\gamma$ -tubulin::GFP (green) and histone H2B::mCherry (red) to visualize  
1271 centrosomes and chromosomes, respectively. The image data was resampled to correct for the  
1272 movements of the male worm. Time is given relative to anaphase onset. Scale bar, 2  $\mu$ m. This  
1273 supplementary movie corresponds to Fig. 3B and Fig. S1A.

1274

1275 **Movie S3. Live-cell imaging of the second meiotic division in wild-type males.**

1276 The strain was labeled with  $\gamma$ -tubulin::GFP (green) and histone H2B::mCherry (red) to visualize  
1277 centrosomes and chromosomes, respectively. The image data was resampled to correct for the  
1278 movements of the male worm. Time is given relative to anaphase onset. Scale bar, 2  $\mu$ m. This  
1279 supplementary movie corresponds to Fig. 3D and Fig. S1B.

1280

1281 **Movie S4. Laser ablation of the microtubule bridge in a meiotic spermatocyte spindle**  
1282 **undergoing the first division.**

1283 Spindle within an immobilized wild-type male worm labeled with  $\beta$ -tubulin::GFP (green) and  
1284 histone H2B::mCherry (red) to visualize microtubules and chromosomes, respectively. The  
1285 applied single laser cut is indicated by a circle. Time is given relative to the laser cut. Scale bar,  
1286 2  $\mu$ m. This supplementary movie corresponds to Fig. 5C (experiment no. 1).

1287



1288 **Movie S5. Double-cut laser ablation of the microtubule bridge in a meiotic spermatocyte**  
1289 **spindle undergoing first meiotic division.**

1290 Spindle within an immobilized wild-type male worm labeled with  $\beta$ -tubulin::GFP (green) and  
1291 histone H2B::mCherry (red) to visualize microtubules and chromosomes, respectively. The laser  
1292 cuts are indicated by circles. Time is given relative to the first laser cut. Scale bar, 2  $\mu$ m. This  
1293 supplementary movie corresponds to Fig. 5D.

1294  
1295 **Movie S6. Full tomographic reconstruction of the metaphase I spindle in a wild-type male**  
1296 **spermatocyte.**

1297 Tomographic slices through the entire 3D volume and corresponding three-dimensional model  
1298 illustrating the organization of the full spindle. Autosomes are shown in different grades of either  
1299 blue or cyan, the X chromosome in red, centriolar microtubules in purple, microtubules within a  
1300 distance of 150 nm or closer to the chromosome surfaces in yellow and all other microtubules in  
1301 gray. This supplementary movie corresponds to Fig. 6A.

1302  
1303 **Movie S7. Full tomographic reconstruction of the spindle at the onset of anaphase I in a**  
1304 **wild-type male spermatocyte.**

1305 Three-dimensional model illustrating the organization of the full spindle. Autosomes are shown in  
1306 different grades of either blue or cyan, the X chromosome in red, centriolar microtubules in  
1307 purple, microtubules within a distance of 150 nm or closer to the chromosome surfaces in yellow  
1308 and all other microtubules in gray. This supplementary movie corresponds to Fig. 6B.

1309  
1310 **Movie S8. Full tomographic reconstruction of the anaphase I spindle (anaphase no. 1) in a**  
1311 **wild-type male spermatocyte.**

1312 Three-dimensional model illustrating the organization of the full spindle. Autosomes are shown in  
1313 different grades of either blue or cyan, the X chromosome in red, centriolar microtubules in

1314 purple, microtubules within a distance of 150 nm or closer to the chromosome surfaces in yellow  
1315 and all other microtubules in gray. This supplementary movie corresponds to Fig. 6C.

1316  
1317 **Movie S9. Full tomographic reconstruction of the anaphase I spindle (anaphase no. 2) in a**  
1318 **wild-type male spermatocyte.**

1319 Three-dimensional model illustrating the organization of the full spindle. Autosomes are shown in  
1320 different grades of either blue or cyan, the X chromosome in red, centriolar microtubules in  
1321 purple, microtubules within a distance of 150 nm or closer to the chromosome surfaces in yellow  
1322 and all other microtubules in gray. This supplementary movie corresponds to Fig. 6D.

1323  
1324 **Movie S10. Full tomographic reconstruction of the anaphase I spindle (anaphase no. 3) in**  
1325 **a wild-type male spermatocyte.**

1326 Tomographic slices through the entire 3D volume and corresponding three-dimensional model  
1327 illustrating the organization of the full spindle. Autosomes are shown in different grades of either  
1328 blue or cyan, the X chromosome in red, centriolar microtubules in purple, microtubules within a  
1329 distance of 150 nm or closer to the chromosome surfaces in yellow and all other microtubules in  
1330 gray. This supplementary movie corresponds to Fig. 6E.

1331  
1332 **Movie S11. Full tomographic reconstruction of the anaphase I spindle (anaphase no. 4) in**  
1333 **a wild-type male spermatocyte.**

1334 Three-dimensional model illustrating the organization of the full spindle. Autosomes are shown in  
1335 different grades of either blue or cyan, the X chromosome in red, centriolar microtubules in  
1336 purple, microtubules within a distance of 150 nm or closer to the chromosome surfaces in yellow  
1337 and all other microtubules in gray. This supplementary movie corresponds to Fig. 6F.

1338

Figure 1. Spindle and X chromosome dynamics during meiotic divisions in males.

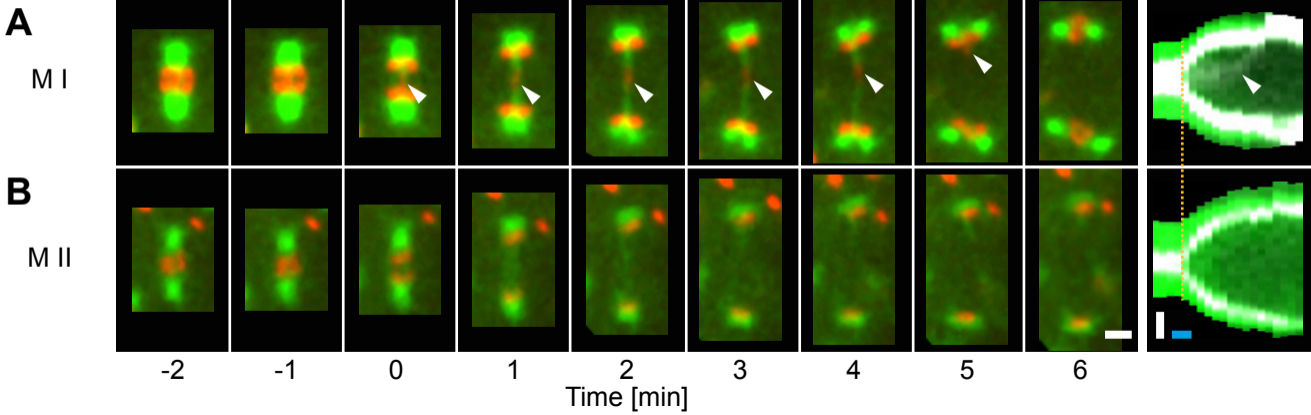

Figure 2. Unpaired chromosomes lag in male spermatocyte meiosis I.

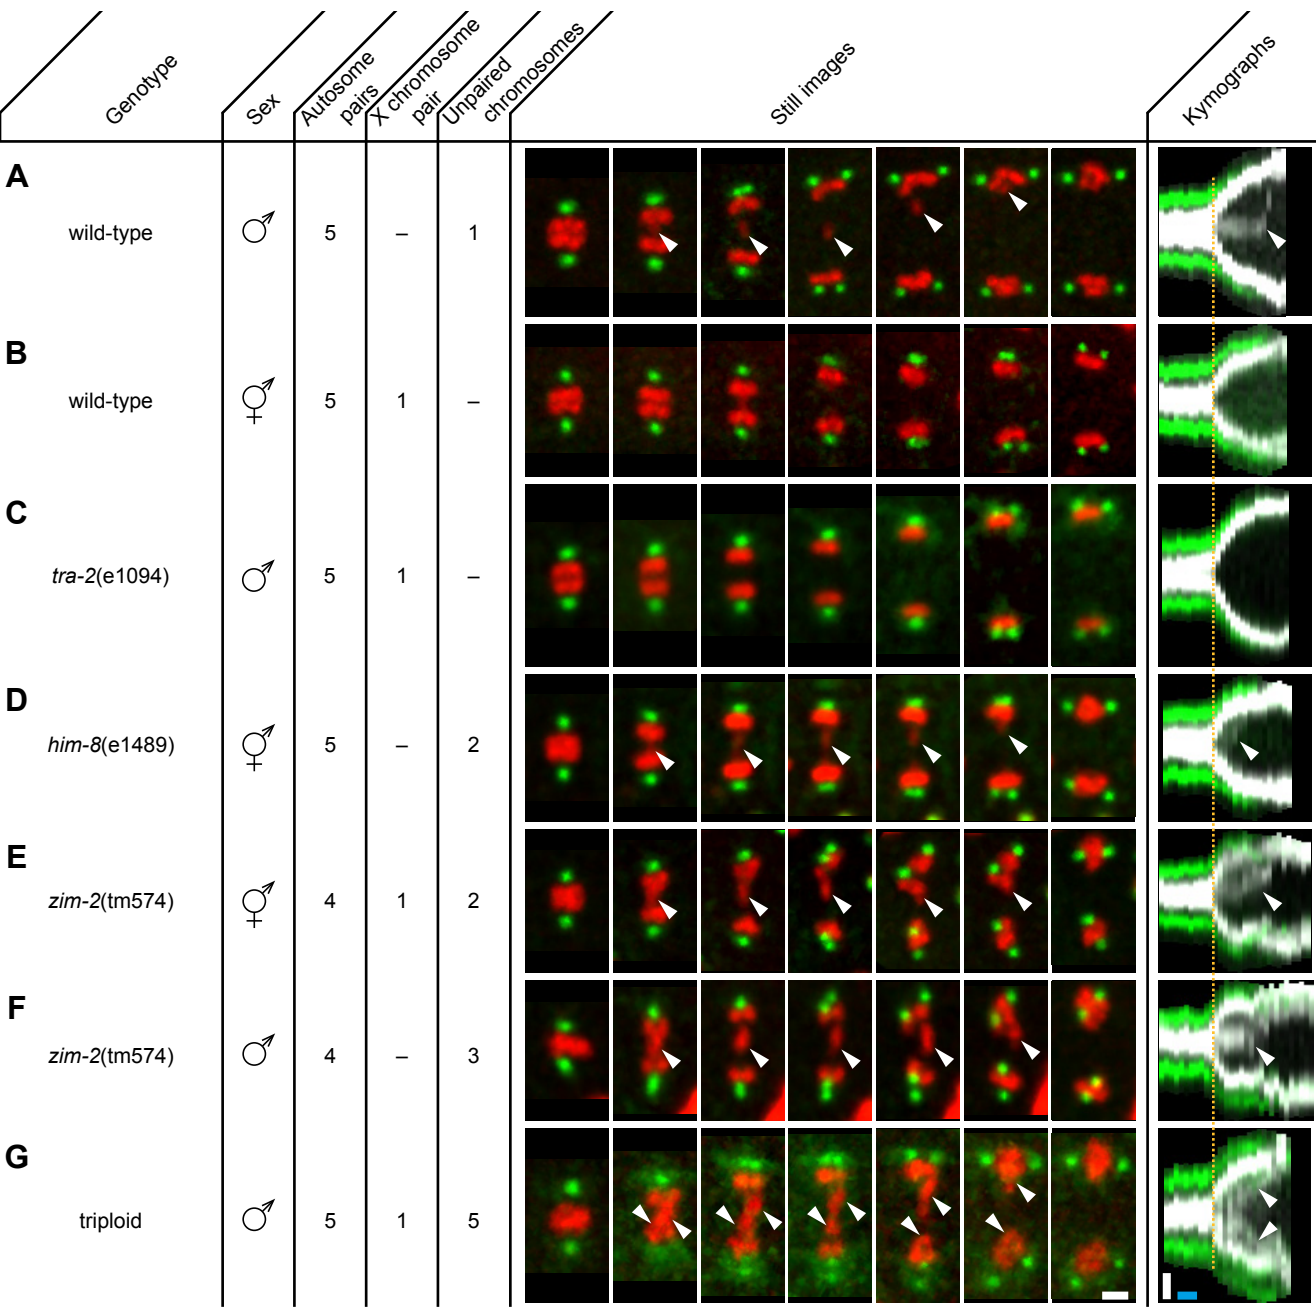

**Figure 3. Spermatocyte meiotic spindles display both anaphase A and B movement.**

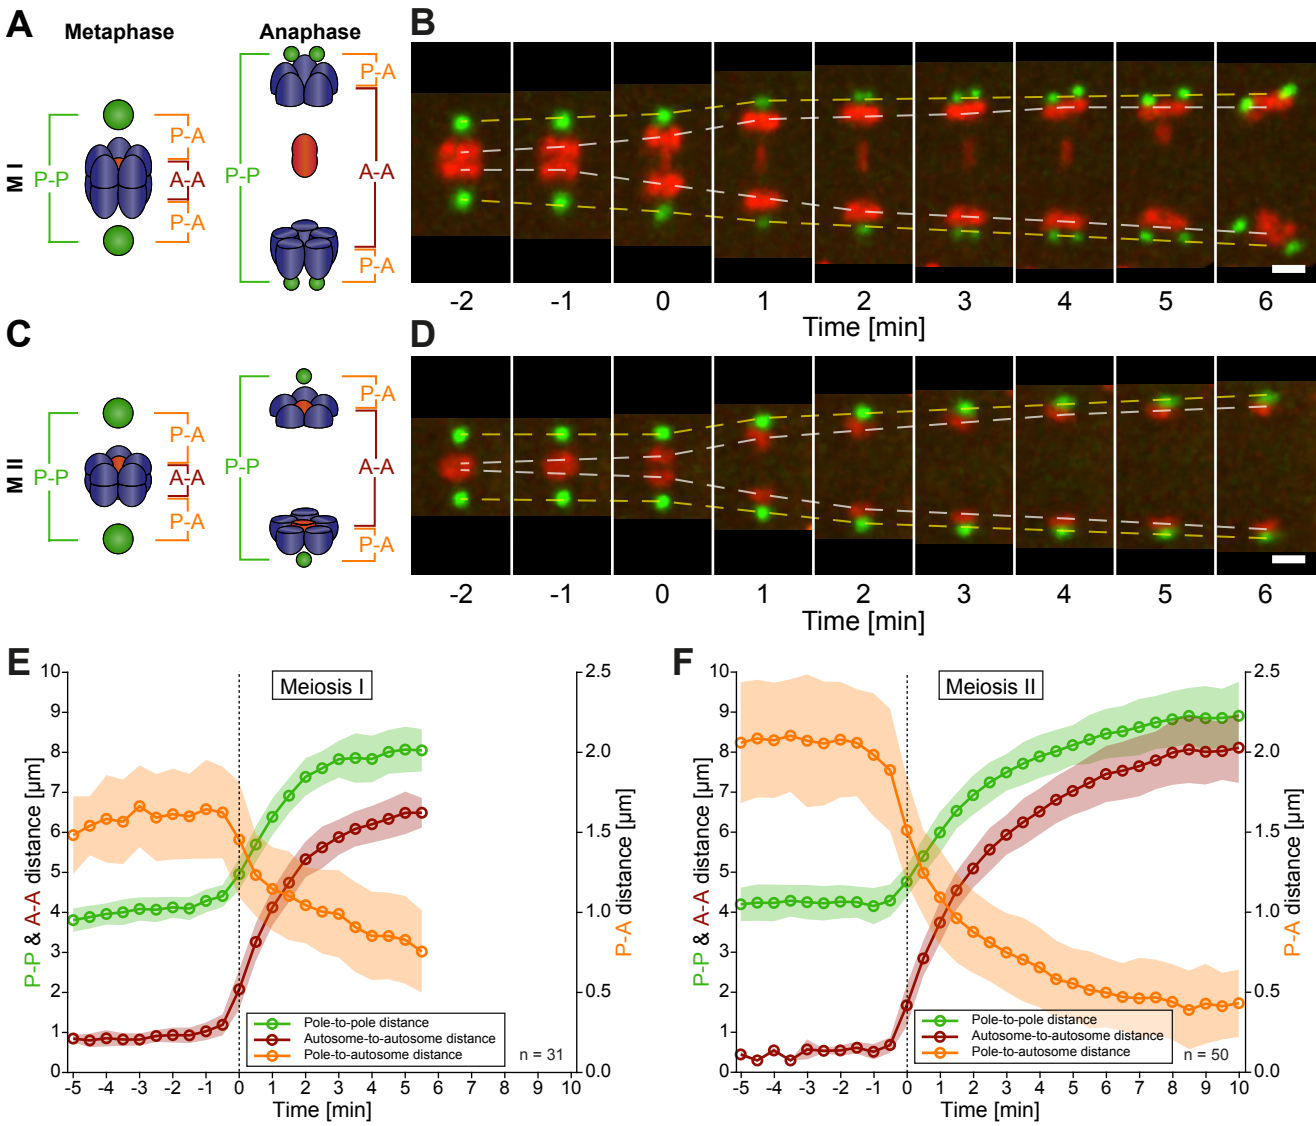

**Figure 4. Kinetochores do not disassemble between spermatocyte meiotic divisions.**

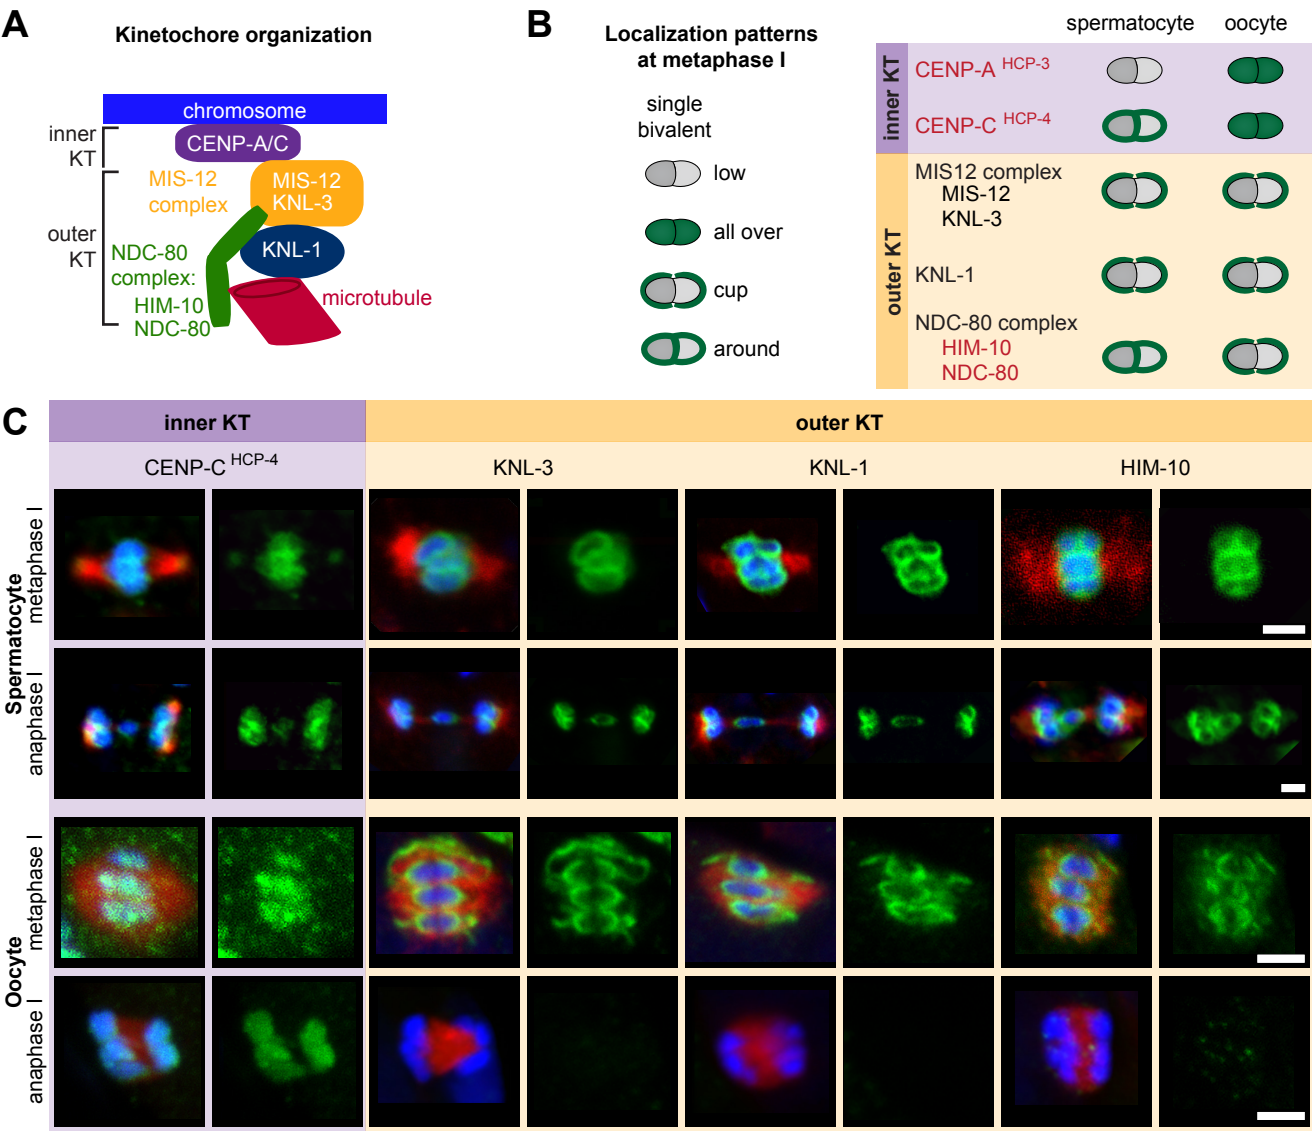

**Figure 5. Microtubules attached to the X chromosome exert a pulling force.**

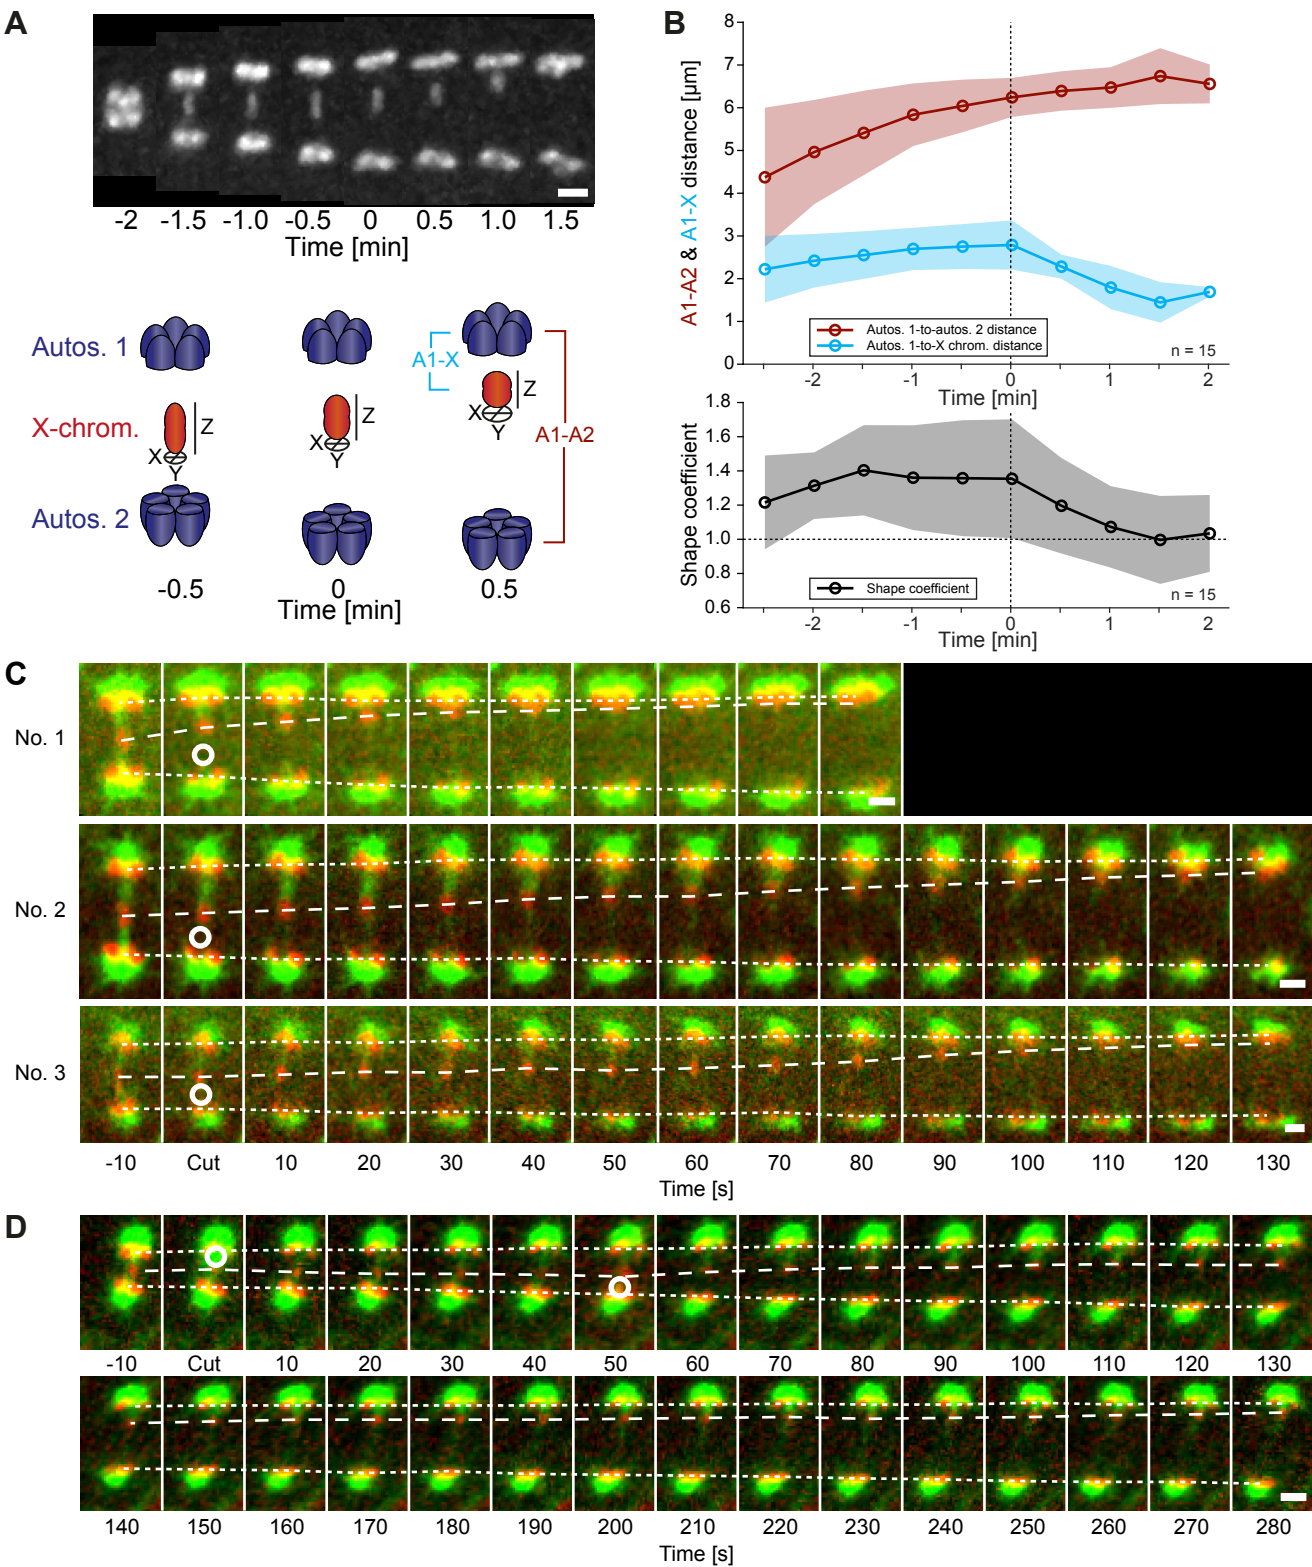

**Figure 6. Three-dimensional ultrastructure of spindles in spermatocyte meiosis I.**

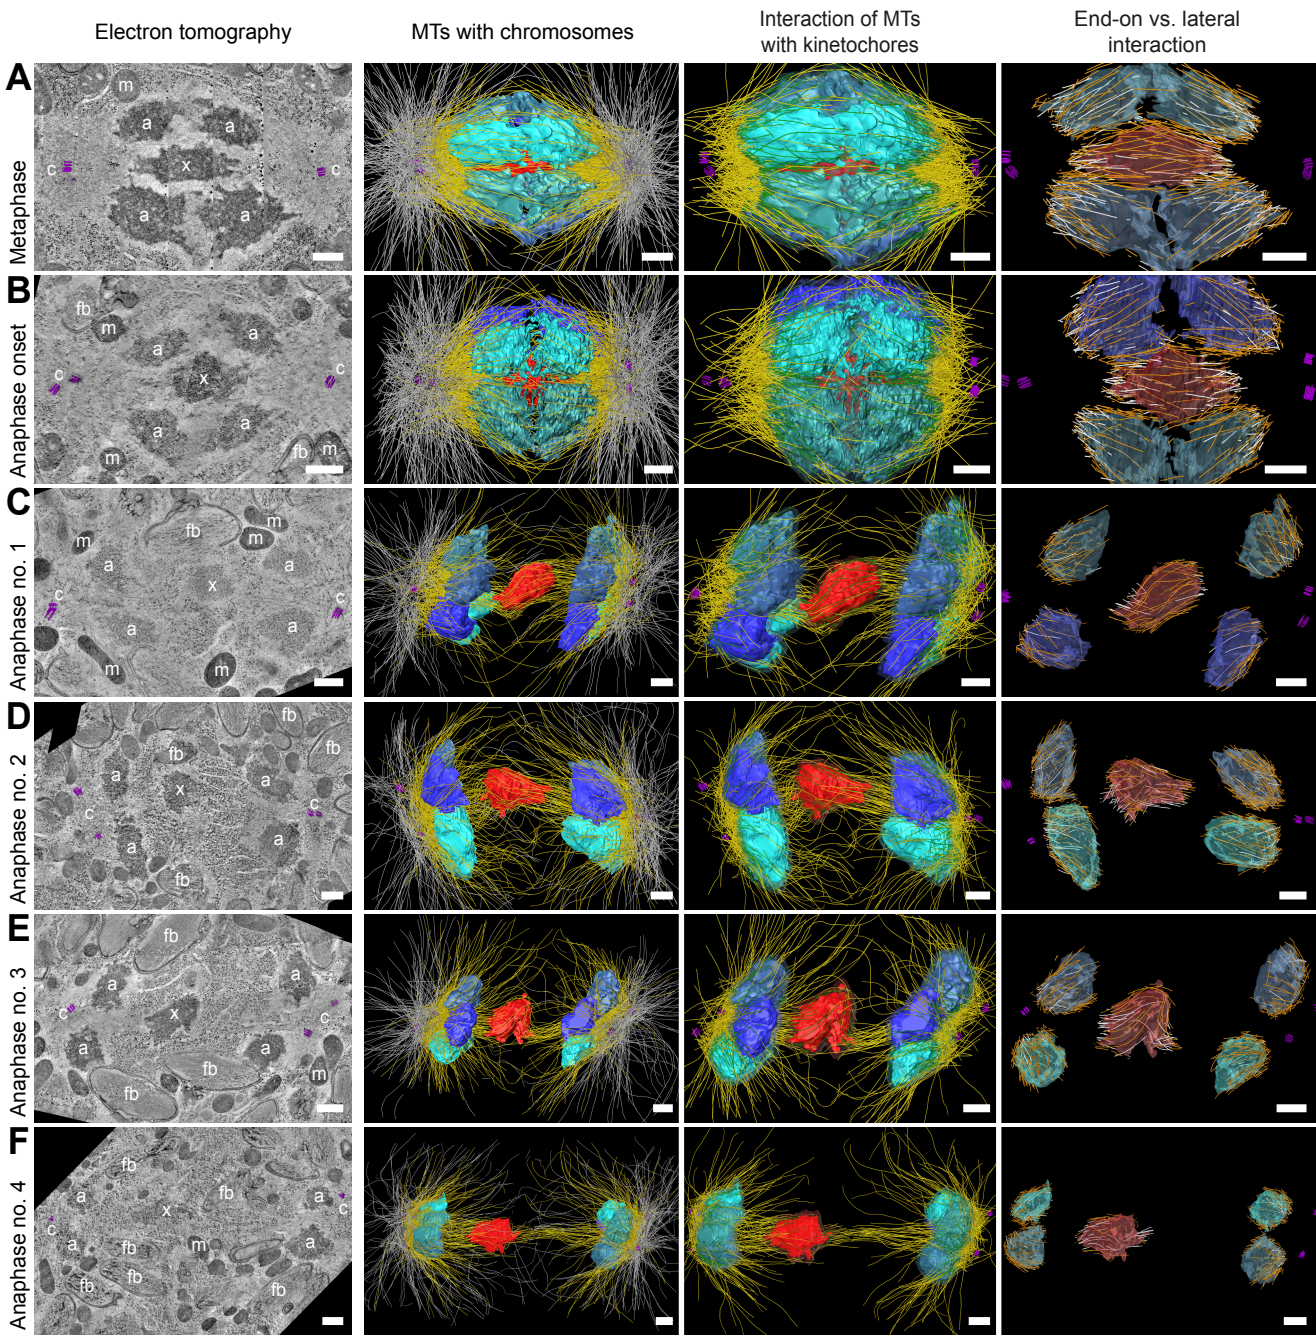



**Figure 7. X chromosome-attached microtubules are continuous and lengthen during anaphase I.**

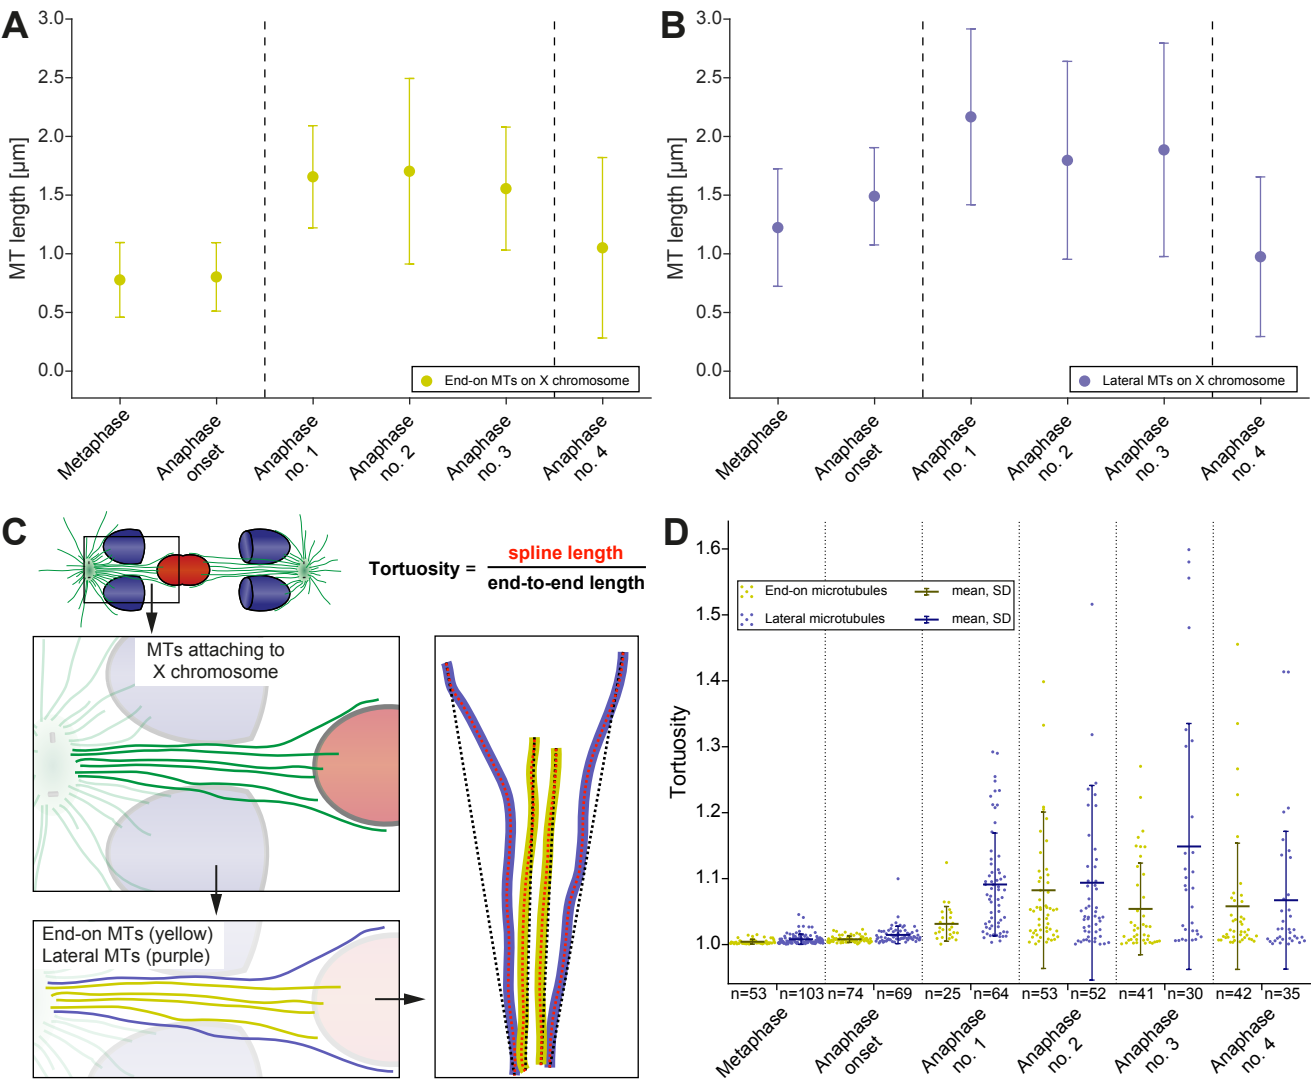

**Figure 8. Resolution of the X chromosome to one side correlates with an asymmetry of microtubules.**

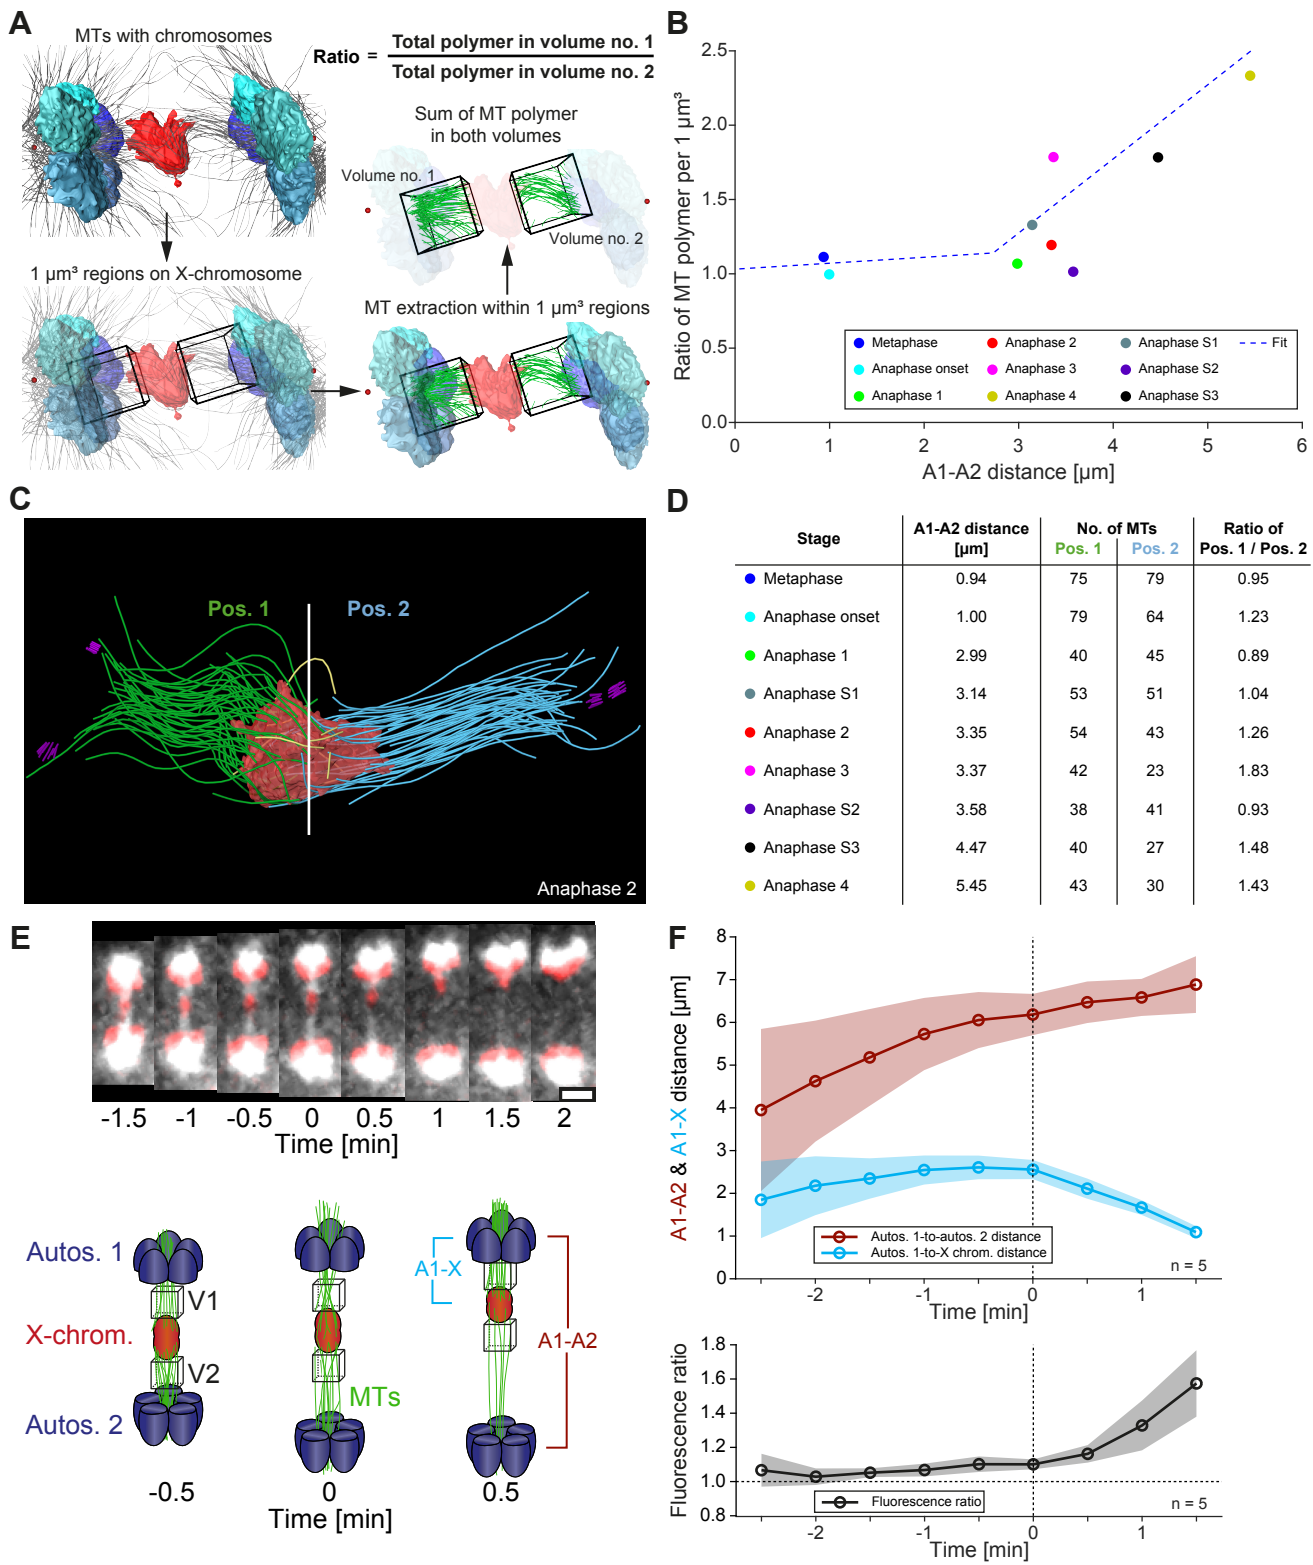

**Figure 9. Autosome-attached kinetochore microtubules do not shorten during anaphase.**

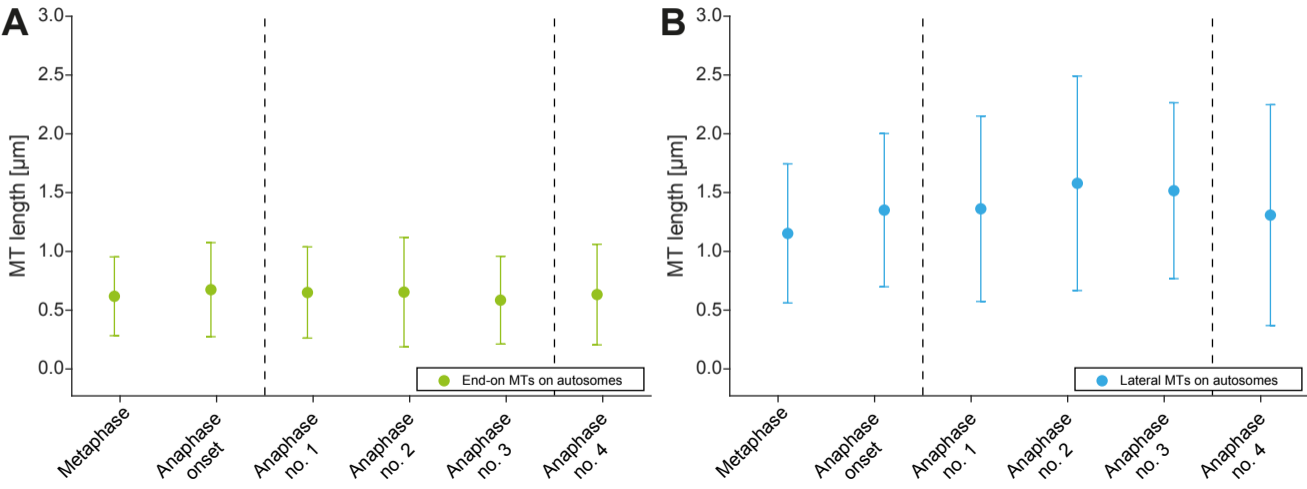

**Figure 10. Changes in the geometry of spindles account for anaphase A pole-chromosome shortening.**

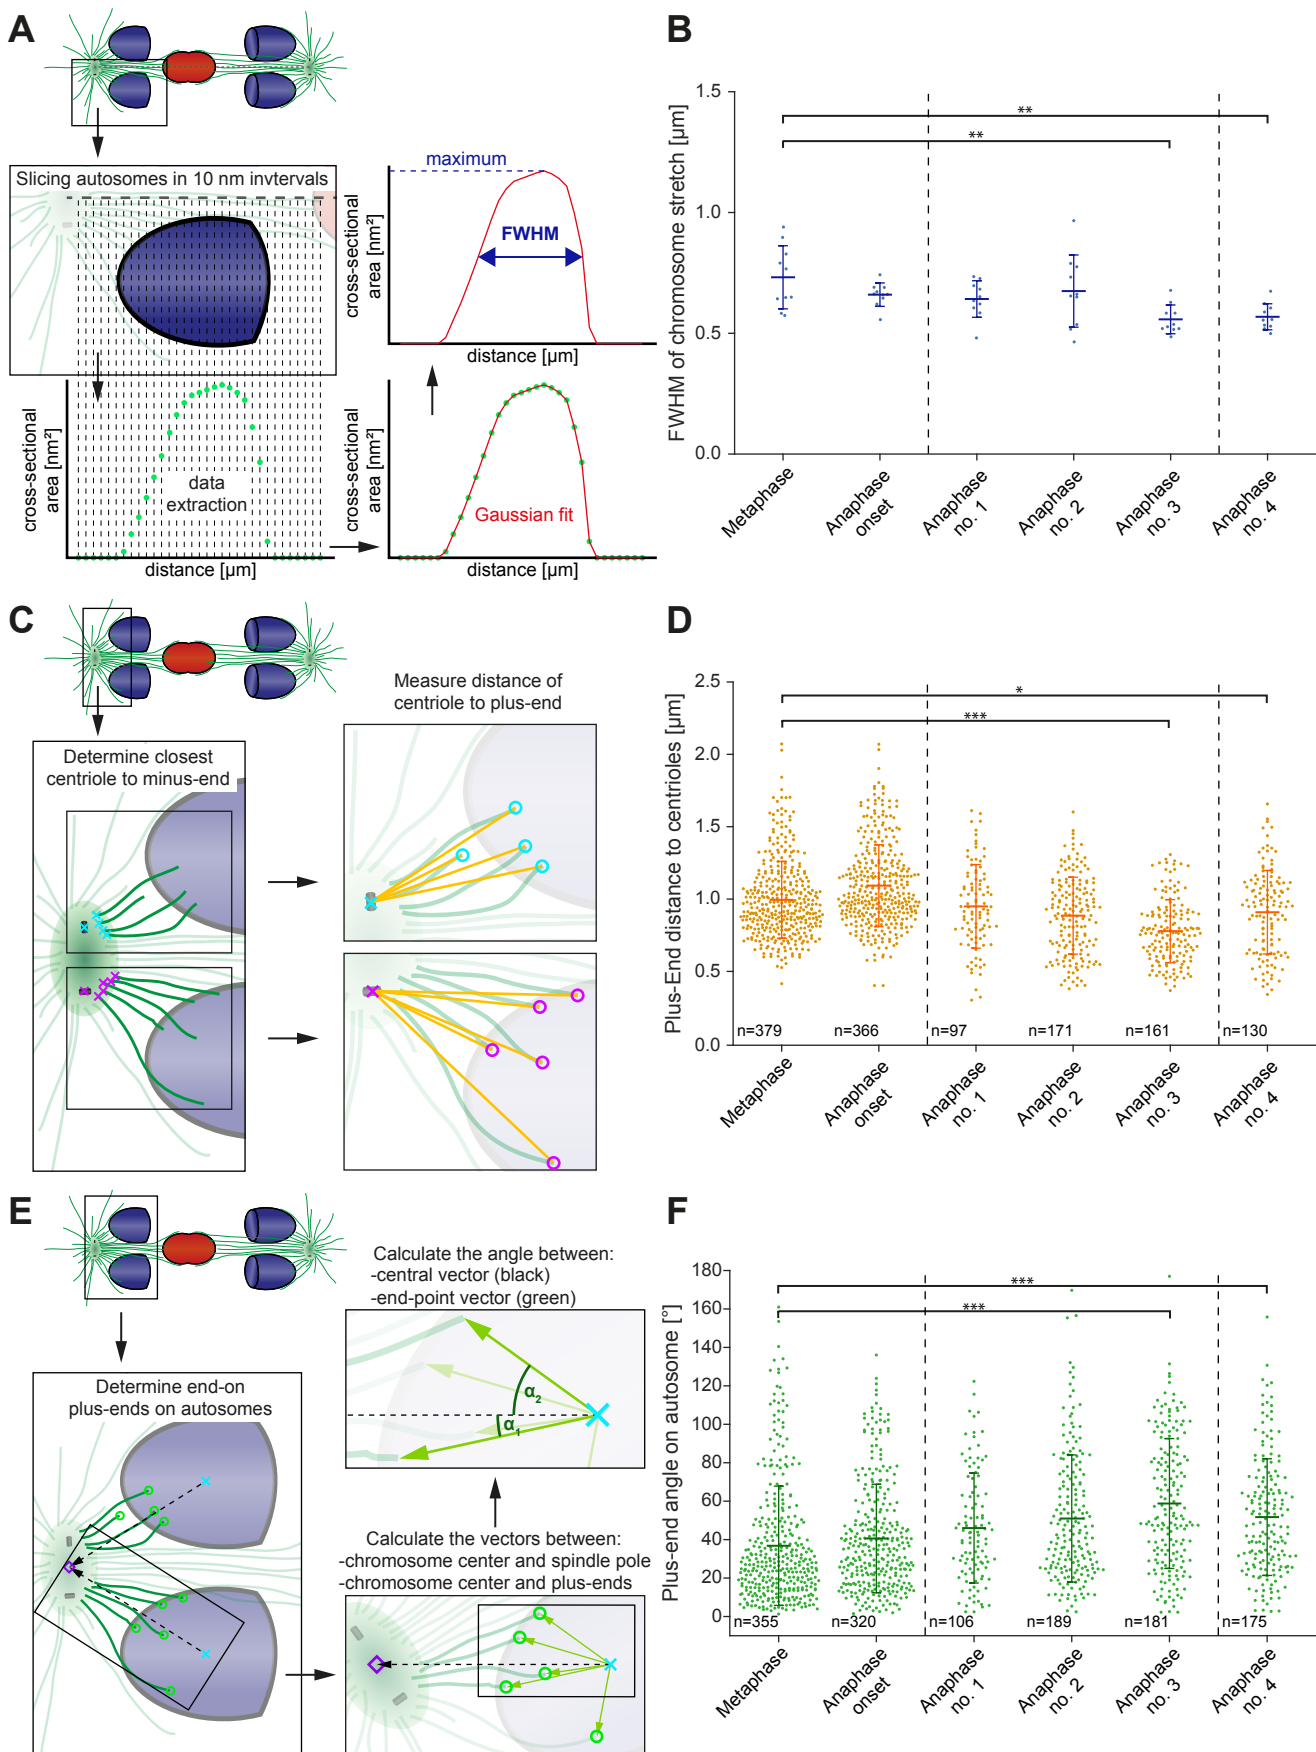

**Figure 11. Proposed models of chromosome movements in meiosis I.**

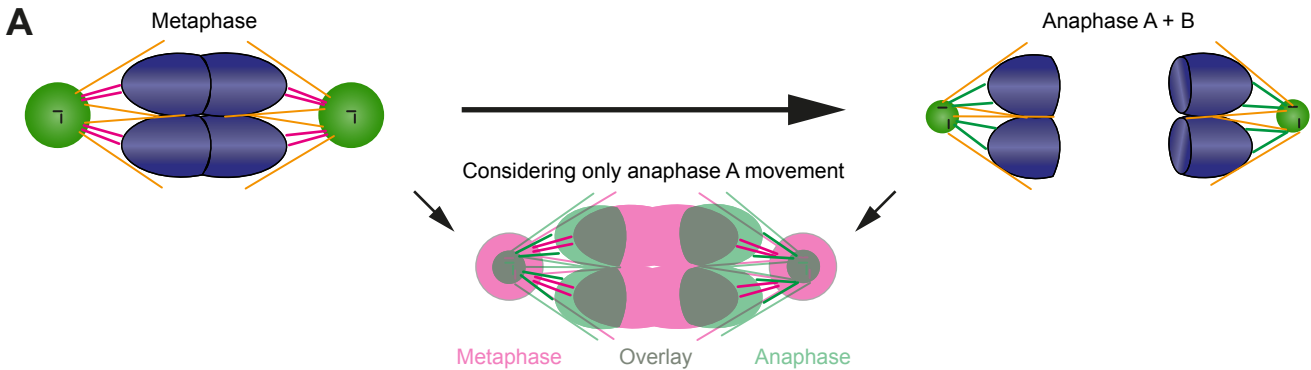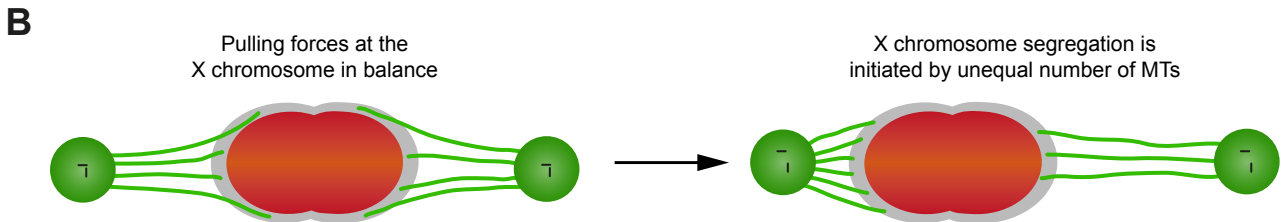

**Figure S1. Analysis of centrosomal volumes in meiosis I and II.**

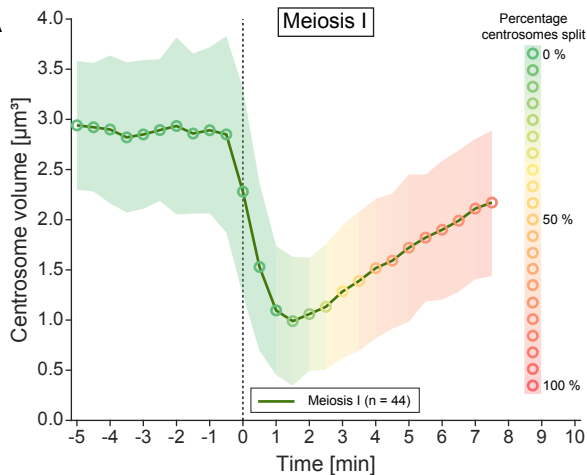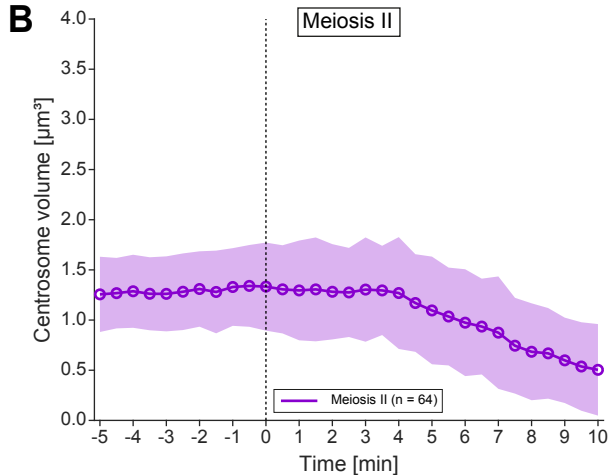

Figure S2. Spindle organization in early embryos and oocytes of *C. elegans*.

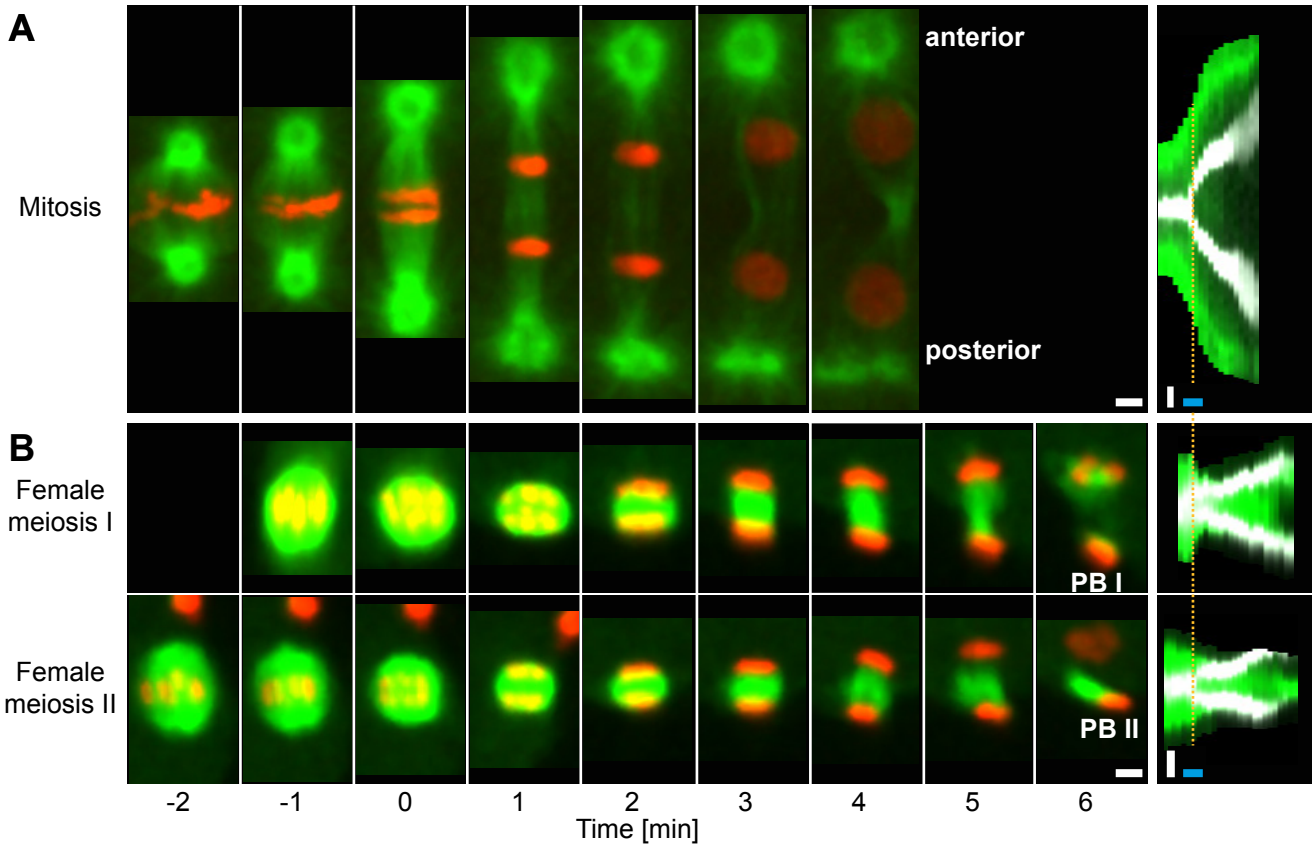

Figure S3. Spindle organization in meiosis I in wild-type and *tra-2* mutants.

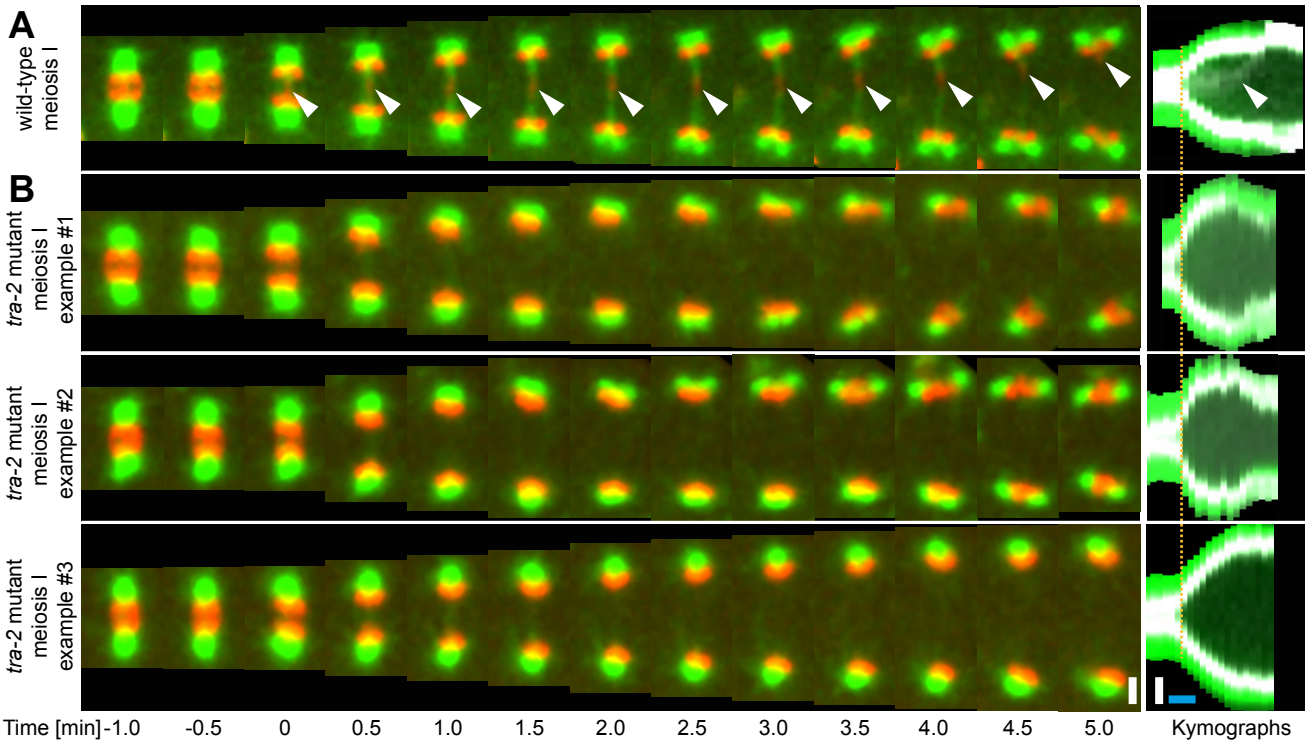



**Figure S4.** The outer kinetochore protein NDC80 localizes between chromosomes and microtubules at spermatocyte metaphase and anaphase I.

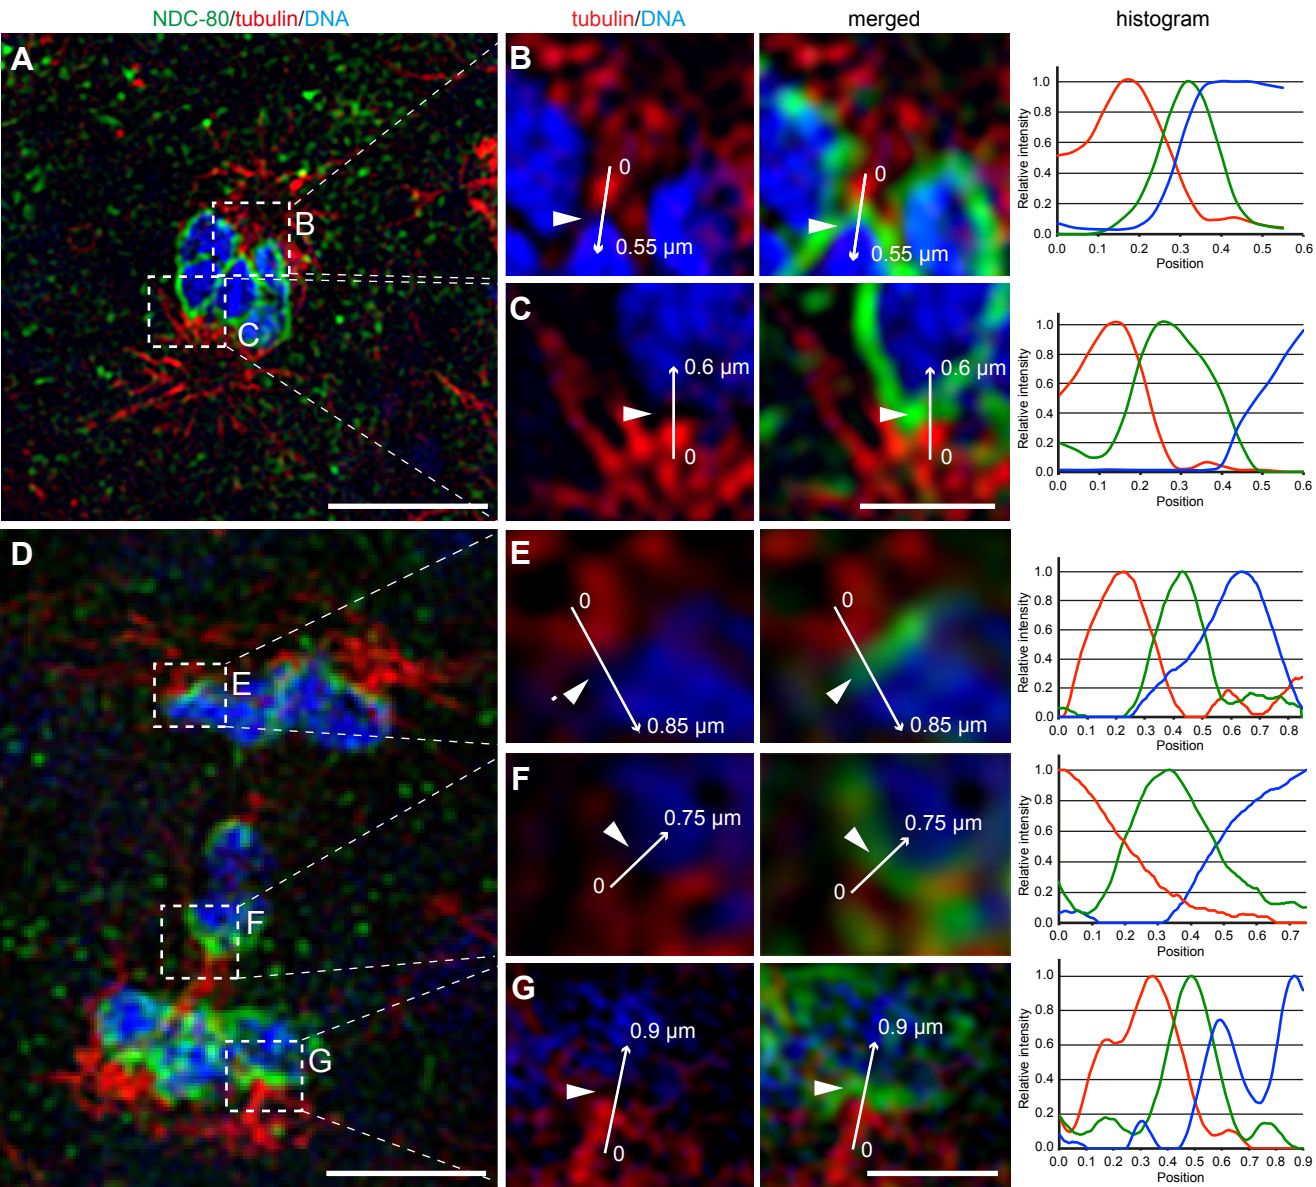

**Figure S5. Visualization of partially reconstructed spindles in mid/late anaphase I.**

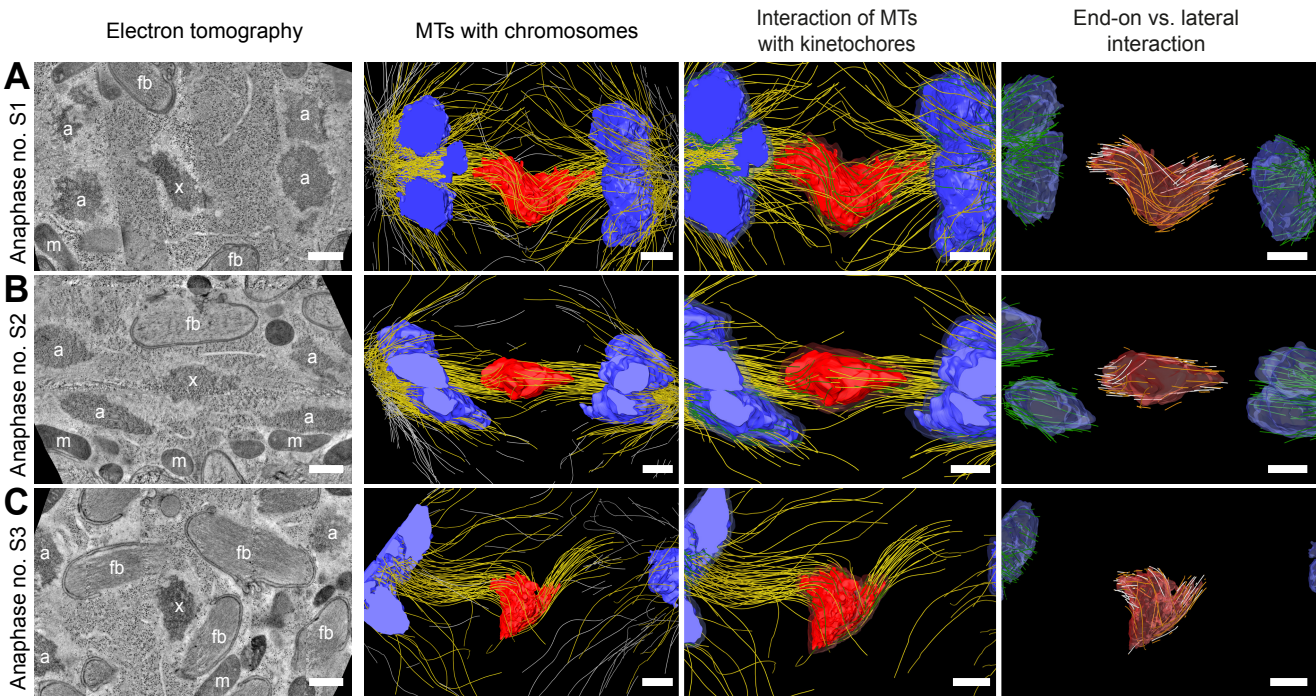

Figure S6. Length distribution of microtubules at different stages of meiosis I.

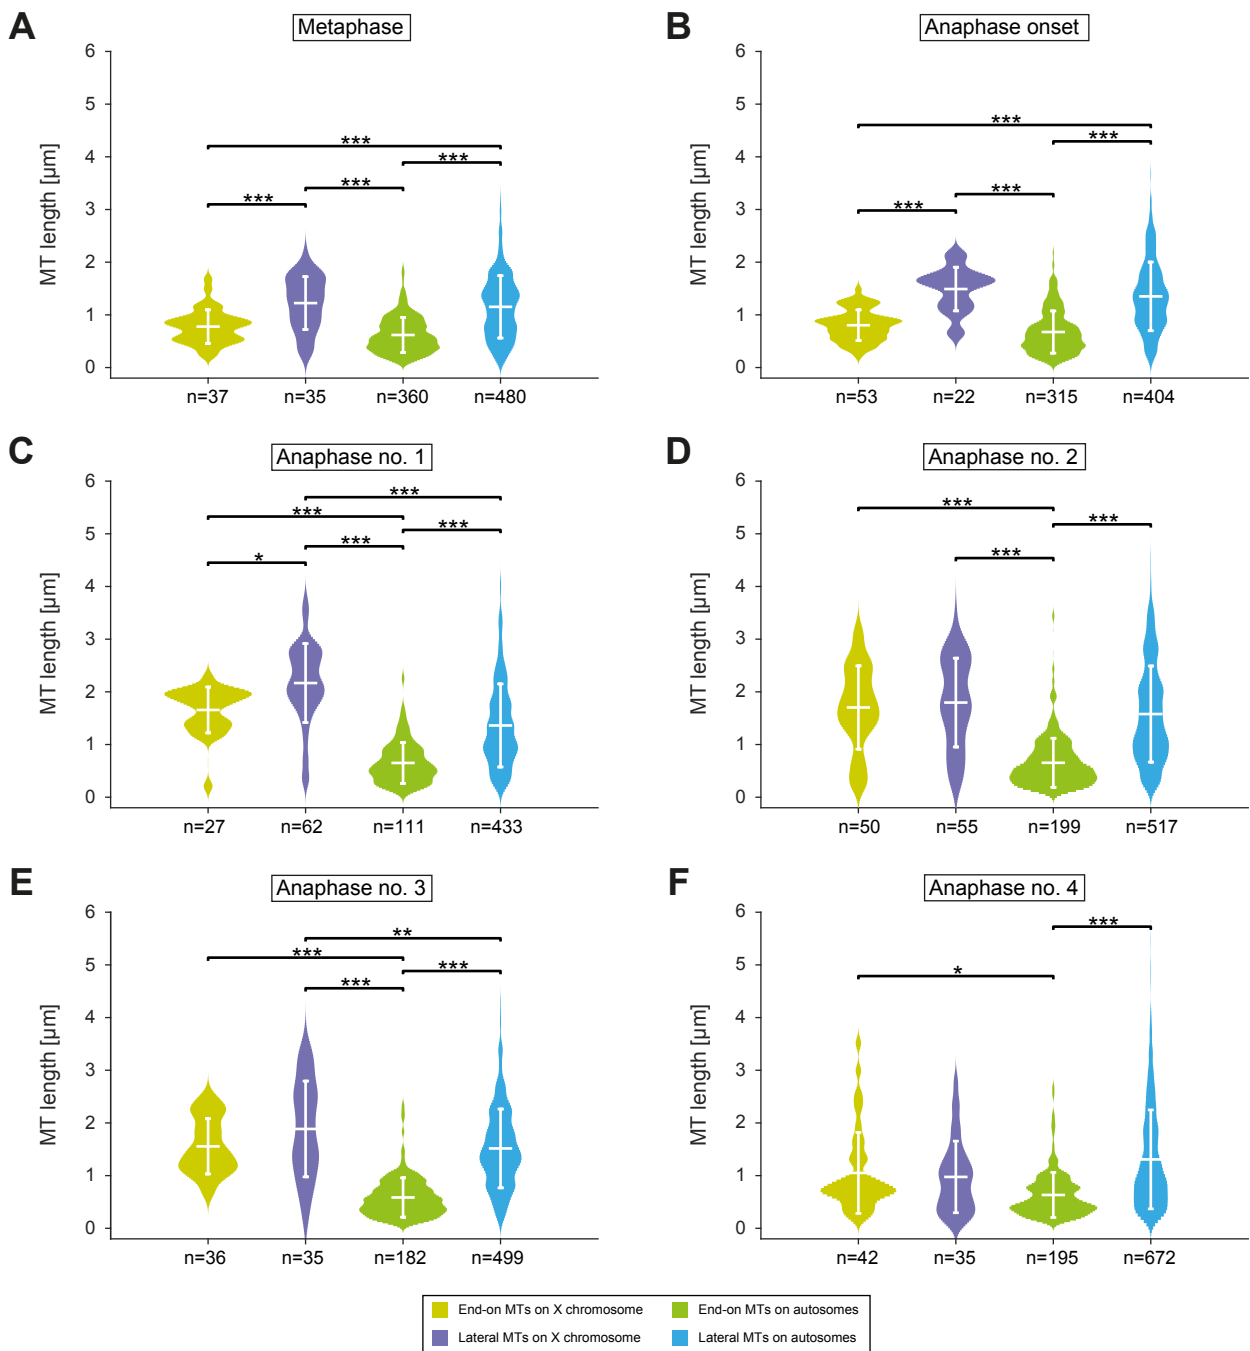

**Figure S7. Comparison of the EM data sets with the dynamic light microscopic data.**

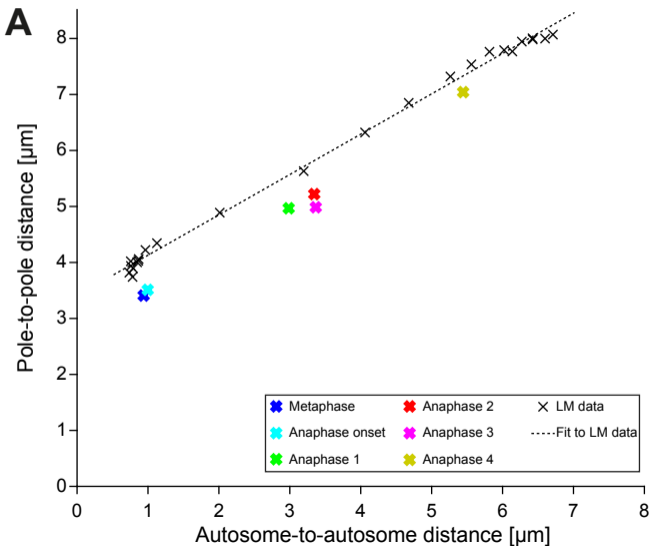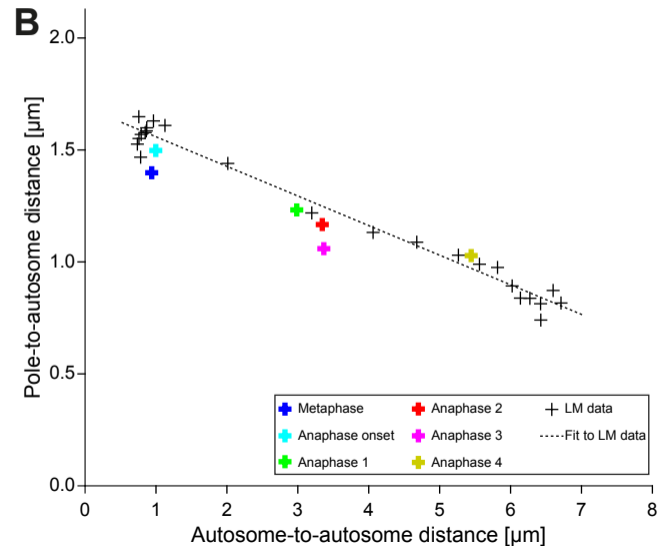

**Figure S8. Comparison of distributions within EM data measurements.**

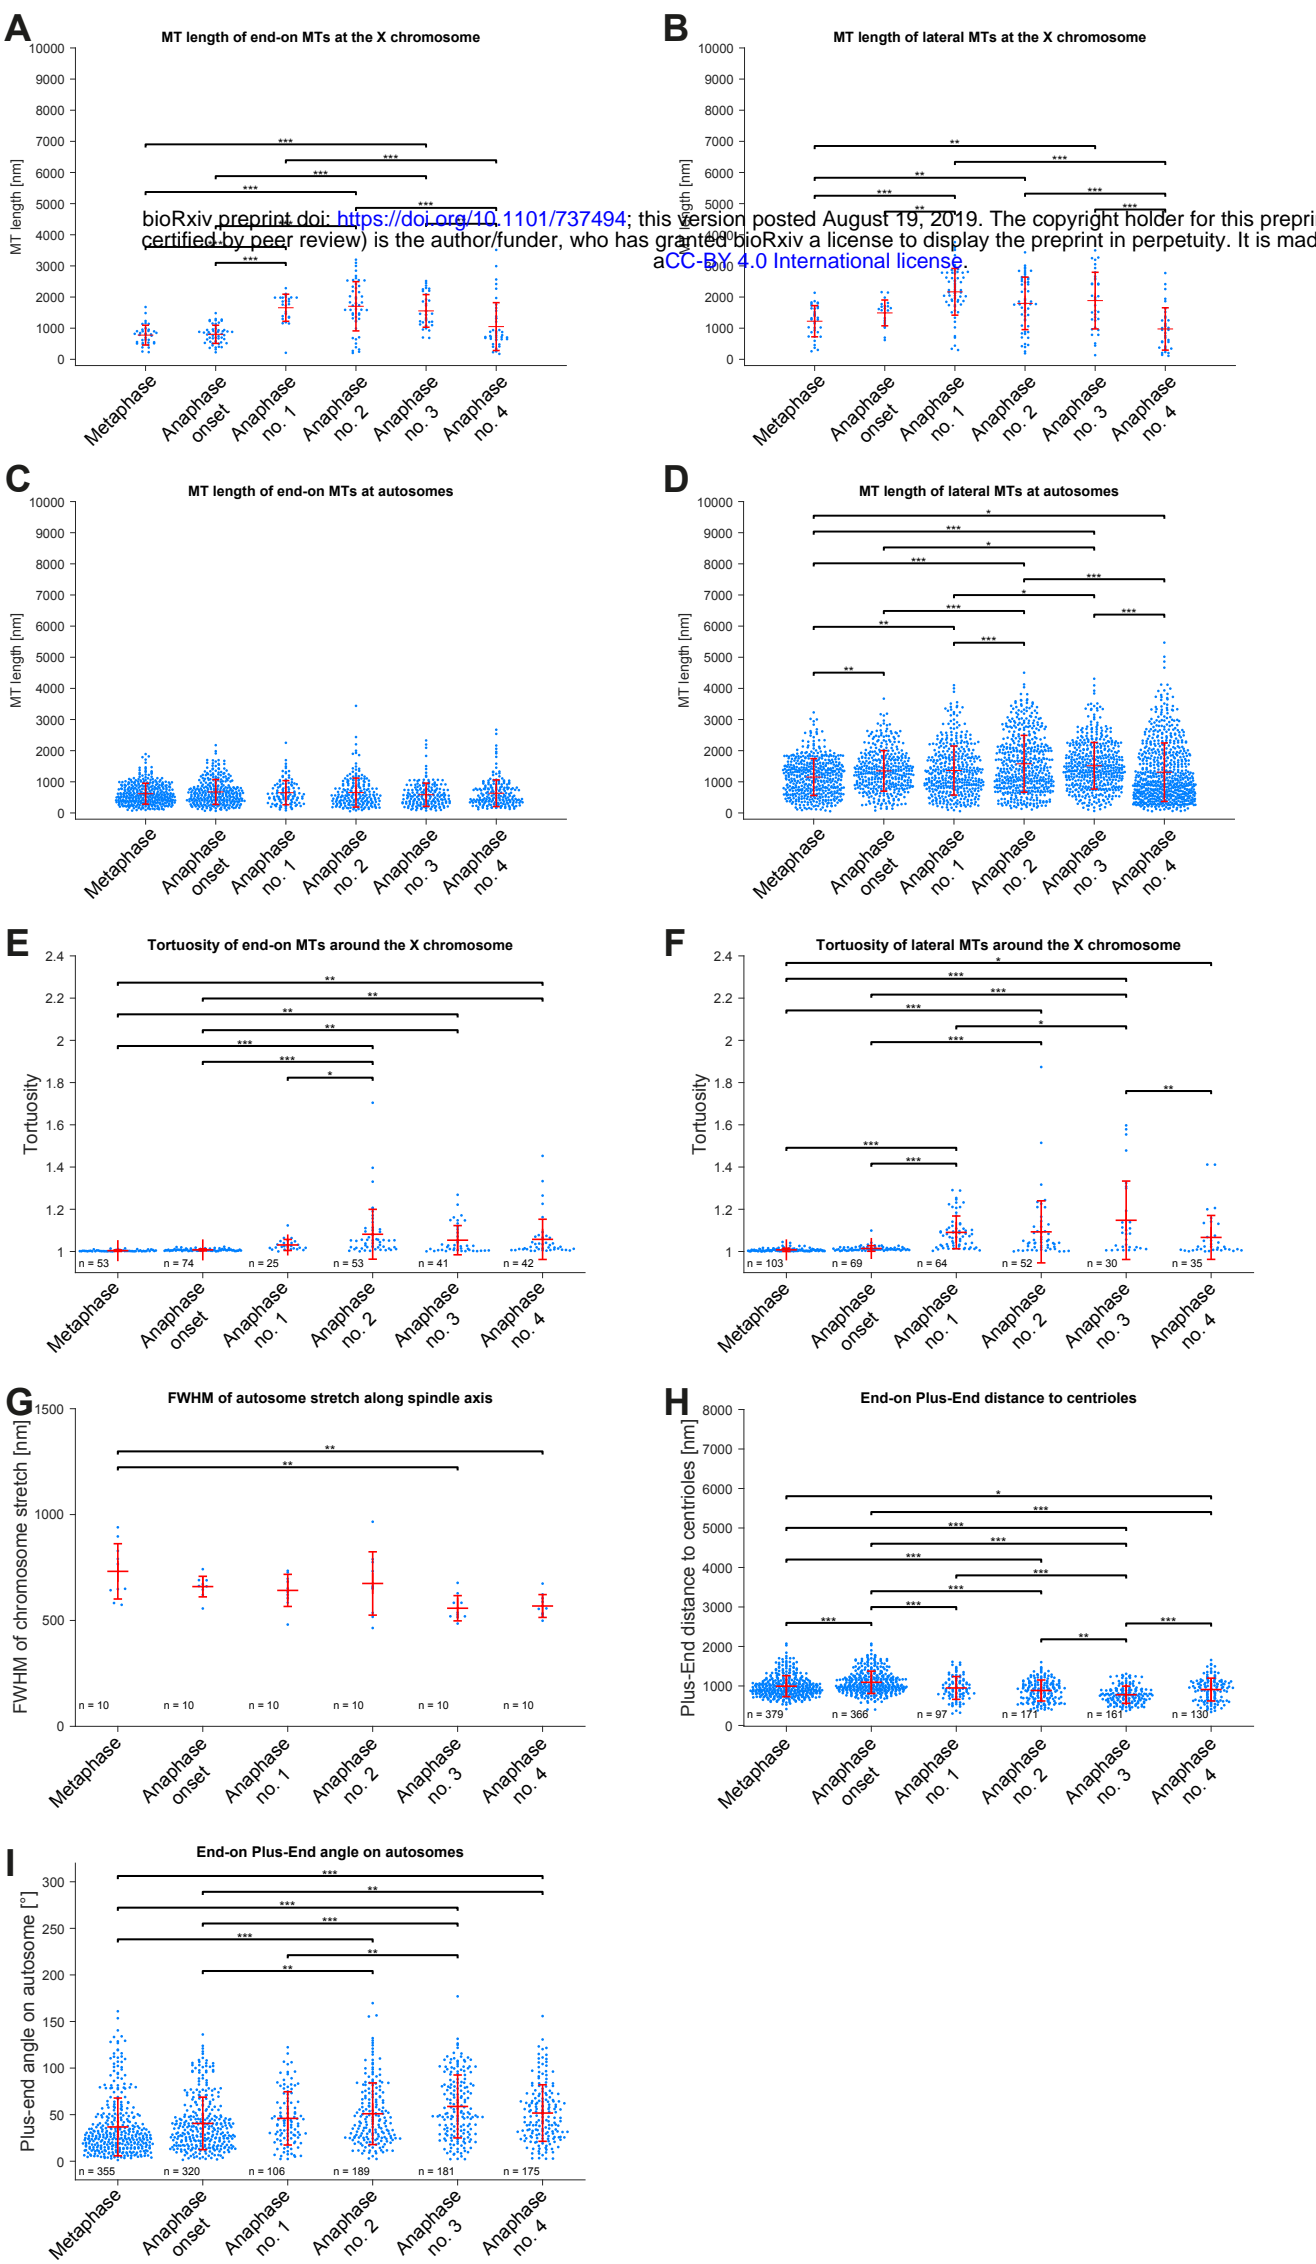

Source: https://www.biorxiv.org/content/10.1101/737494v1.full.pdf
